# Supplementary material for: Image3C, a multimodal image-based and label-independent integrative method for single-cell analysis
Source: eLife journal article supplement (doi:10.7554/elife.65372), 2021-07-21
Supplement: supp [file elife-65372-supp-v1.zip]

**Zebrafish**  
**Homeostasis**  
**Cell Morphology**  
**Cell Gallery**

Cluster  
*Dr1*

Lymphocytes / Progenitors

| Cell # | BF                                                                                   | SSC                                                                                   | Draq5                                                                                 | Ch01/Ch02/C                                                                           |
|--------|--------------------------------------------------------------------------------------|---------------------------------------------------------------------------------------|---------------------------------------------------------------------------------------|---------------------------------------------------------------------------------------|
| 788    |     |     |     |     |
| 815    |    |    |    |    |
| 853    |    |    |    |    |
| 866    |    |    |    |    |
| 904    |    |    |    |    |
| 913    |    |    |    |    |
| 934    |    |    |    |    |
| 1111   |    |    |    |    |
| 1120   |   |   |   |   |
| 1154   |  |  |  |  |
| 1160   |  |  |  |  |
| 1169   |  |  |  |  |
| 1184   |  |  |  |  |
| 1204   |  |  |  |  |
| 1207   |  |  |  |  |
| 1217   |  |  |  |  |
| 1238   |  |  |  |  |
| 1247   |  |  |  |  |
| 1248   |  |  |  |  |
| 1254   |  |  |  |  |

Cluster  
*Dr2*  
Dead cells

| Cell # | BF                                                                                   | SSC                                                                                   | Draq5                                                                                 | Ch01/Ch02/C                                                                           |
|--------|--------------------------------------------------------------------------------------|---------------------------------------------------------------------------------------|---------------------------------------------------------------------------------------|---------------------------------------------------------------------------------------|
| 16     |     |     |     |     |
| 24     |    |    |    |    |
| 29     |    |    |    |    |
| 30     |    |    |    |    |
| 32     |    |    |    |    |
| 37     |    |    |    |    |
| 64     |    |    |    |    |
| 87     |    |    |    |    |
| 92     |   |   |   |   |
| 94     |  |  |  |  |
| 98     |  |  |  |  |
| 119    |  |  |  |  |
| 130    |  |  |  |  |
| 143    |  |  |  |  |
| 148    |  |  |  |  |
| 154    |  |  |  |  |
| 158    |  |  |  |  |
| 161    |  |  |  |  |
| 169    |  |  |  |  |
| 170    |  |  |  |  |

Cluster  
*Dr3*  
Dead cells

| Cell # | BF                                                                                   | SSC                                                                                   | Draq5                                                                                 | Ch01/Ch02/C                                                                           |
|--------|--------------------------------------------------------------------------------------|---------------------------------------------------------------------------------------|---------------------------------------------------------------------------------------|---------------------------------------------------------------------------------------|
| 46     |     |     |     |     |
| 166    |    |    |    |    |
| 173    |    |    |    |    |
| 175    |    |    |    |    |
| 190    |    |    |    |    |
| 212    |    |    |    |    |
| 283    |    |    |    |    |
| 340    |    |    |    |    |
| 367    |  |  |  |  |
| 641    |  |  |  |  |
| 693    |  |  |  |  |
| 711    |  |  |  |  |
| 938    |  |  |  |  |
| 947    |  |  |  |  |
| 1118   |  |  |  |  |
| 1165   |  |  |  |  |
| 1175   |  |  |  |  |
| 1229   |  |  |  |  |
| 1370   |  |  |  |  |
| 1458   |  |  |  |  |



Cluster  
*Dr4*  
  
Dead cells

| Cell # | BF                                                                                   |  | SSC                                                                                   | Draq5                                                                                 | Ch01/Ch02/C                                                                           |
|--------|--------------------------------------------------------------------------------------|--|---------------------------------------------------------------------------------------|---------------------------------------------------------------------------------------|---------------------------------------------------------------------------------------|
| 15     |     |  |     |     |     |
| 44     |    |  |    |    |    |
| 56     |    |  |    |    |    |
| 80     |    |  |    |    |    |
| 85     |    |  |    |    |    |
| 102    |    |  |    |    |    |
| 192    |    |  |    |    |    |
| 208    |    |  |    |    |    |
| 237    |   |  |   |   |   |
| 287    |  |  |  |  |  |
| 296    |  |  |  |  |  |
| 346    |  |  |  |  |  |
| 371    |  |  |  |  |  |
| 379    |  |  |  |  |  |
| 393    |  |  |  |  |  |
| 406    |  |  |  |  |  |
| 420    |  |  |  |  |  |
| 427    |  |  |  |  |  |
| 466    |  |  |  |  |  |
| 488    |  |  |  |  |  |

Cluster  
*Dr5*  
Dead cells

| Cell # | BF                                                                                   | SSC                                                                                   | Draq5                                                                                 | Ch01/Ch02/C                                                                           |
|--------|--------------------------------------------------------------------------------------|---------------------------------------------------------------------------------------|---------------------------------------------------------------------------------------|---------------------------------------------------------------------------------------|
| 7      |     |     |     |     |
| 11     |    |    |    |    |
| 12     |    |    |    |    |
| 33     |    |    |    |    |
| 53     |    |    |    |    |
| 58     |    |    |    |    |
| 76     |    |    |    |    |
| 89     |    |    |    |    |
| 93     |    |    |    |    |
| 105    |   |   |   |   |
| 122    |  |  |  |  |
| 176    |  |  |  |  |
| 188    |  |  |  |  |
| 204    |  |  |  |  |
| 214    |  |  |  |  |
| 225    |  |  |  |  |
| 248    |  |  |  |  |
| 280    |  |  |  |  |
| 285    |  |  |  |  |
| 294    |  |  |  |  |

Cluster  
*Dr6*  
Erythrocytes

| Cell # | BF                                                                                   | SSC                                                                                   | Draq5                                                                                 | Ch01/Ch02/C                                                                           |
|--------|--------------------------------------------------------------------------------------|---------------------------------------------------------------------------------------|---------------------------------------------------------------------------------------|---------------------------------------------------------------------------------------|
| 69     |     |     |     |     |
| 96     |    |    |    |    |
| 109    |    |    |    |    |
| 194    |    |    |    |    |
| 416    |    |    |    |    |
| 597    |    |    |    |    |
| 885    |    |    |    |    |
| 910    |    |    |    |    |
| 1026   |    |    |    |    |
| 1280   |  |  |  |  |
| 1301   |  |  |  |  |
| 1541   |  |  |  |  |
| 1551   |  |  |  |  |
| 1605   |  |  |  |  |
| 1757   |  |  |  |  |
| 1759   |  |  |  |  |
| 1827   |  |  |  |  |
| 1871   |  |  |  |  |
| 2299   |  |  |  |  |
| 2322   |  |  |  |  |

Cluster  
*Dr7*

Lymphocytes / Progenitors

| Cell # | BF                                                                                   | SSC                                                                                   | Draq5                                                                                 | Ch01/Ch02/C                                                                           |
|--------|--------------------------------------------------------------------------------------|---------------------------------------------------------------------------------------|---------------------------------------------------------------------------------------|---------------------------------------------------------------------------------------|
| 2199   |     |     |     |     |
| 2203   |    |    |    |    |
| 2211   |    |    |    |    |
| 2214   |    |    |    |    |
| 2228   |    |    |    |    |
| 2230   |    |    |    |    |
| 2244   |    |    |    |    |
| 2253   |   |   |   |   |
| 2255   |  |  |  |  |
| 2284   |  |  |  |  |
| 2287   |  |  |  |  |
| 2289   |  |  |  |  |
| 2298   |  |  |  |  |
| 2305   |  |  |  |  |
| 2311   |  |  |  |  |
| 2324   |  |  |  |  |
| 2333   |  |  |  |  |
| 2336   |  |  |  |  |
| 2337   |  |  |  |  |
| 2340   |  |  |  |  |

Cluster  
*Dr8*  
Promyelocytes

| Cell # | BF                                                                                   | SSC                                                                                   | Draq5                                                                                 | Ch01/Ch02/C                                                                           |
|--------|--------------------------------------------------------------------------------------|---------------------------------------------------------------------------------------|---------------------------------------------------------------------------------------|---------------------------------------------------------------------------------------|
| 969    | 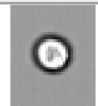    |     |     |     |
| 972    |    |    |    |    |
| 973    |    |    |    |    |
| 982    |    |    |    |    |
| 998    |    |    |    |    |
| 1005   |    |    |    |    |
| 1018   |    |    |    |    |
| 1025   |   |   |   |   |
| 1031   |  |  |  |  |
| 1043   |  |  |  |  |
| 1052   |  |  |  |  |
| 1057   |  |  |  |  |
| 1067   |  |  |  |  |
| 1068   |  |  |  |  |
| 1072   |  |  |  |  |
| 1080   |  |  |  |  |
| 1084   |  |  |  |  |
| 1088   |  |  |  |  |
| 1112   |  |  |  |  |
| 1122   |  |  |  |  |

Cluster  
*Dr9*

Debris

| Cell # | BF                                                                                   | SSC                                                                                   | Draq5                                                                                 | Ch01/Ch02/C                                                                           |
|--------|--------------------------------------------------------------------------------------|---------------------------------------------------------------------------------------|---------------------------------------------------------------------------------------|---------------------------------------------------------------------------------------|
| 40     | 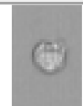    |     |     |     |
| 118    |    |    |    |    |
| 317    |    |    |    |    |
| 908    |    |    |    |    |
| 952    |    |    |    |    |
| 1252   |    |    |    |    |
| 1434   |    |    |    |    |
| 1516   |    |    |    |    |
| 1529   |    |    |    |    |
| 1638   |   |   |   |   |
| 1950   |  |  |  |  |
| 2036   |  |  |  |  |
| 2186   |  |  |  |  |
| 2541   |  |  |  |  |
| 2718   |  |  |  |  |
| 2998   |  |  |  |  |
| 3478   |  |  |  |  |

Cluster  
*Dr10*  
Neutrophils

| Cell # | BF                                                                                   | SSC                                                                                   | Draq5                                                                                 | Ch01/Ch02/C                                                                           |
|--------|--------------------------------------------------------------------------------------|---------------------------------------------------------------------------------------|---------------------------------------------------------------------------------------|---------------------------------------------------------------------------------------|
| 1657   | 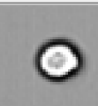    |     |     |     |
| 1659   |    |    |    |    |
| 1677   |    |    |    |    |
| 1678   |    |    |    |    |
| 1680   |    |    |    |    |
| 1683   |    |    |    |    |
| 1685   |    |    |    |    |
| 1699   |   |   |   |   |
| 1764   |  |  |  |  |
| 1771   |  |  |  |  |
| 1784   |  |  |  |  |
| 1789   |  |  |  |  |
| 1797   |  |  |  |  |
| 1804   |  |  |  |  |
| 1819   |  |  |  |  |
| 1835   |  |  |  |  |
| 1836   |  |  |  |  |
| 1846   |  |  |  |  |
| 1855   |  |  |  |  |
| 1866   |  |  |  |  |

Cluster  
*Dr11*  
Myeloid Precursors

| Cell # | BF                                                                                   | SSC                                                                                   | Draq5                                                                                 | Ch01/Ch02/C                                                                           |
|--------|--------------------------------------------------------------------------------------|---------------------------------------------------------------------------------------|---------------------------------------------------------------------------------------|---------------------------------------------------------------------------------------|
| 1335   |     |     |     |     |
| 1355   |    |    |    |    |
| 1476   |    |    |    |    |
| 1479   |    |    |    |    |
| 1540   |    |    |    |    |
| 1594   |    |    |    |    |
| 1614   |    |    |    |    |
| 1624   |   |   |   |   |
| 1634   |  |  |  |  |
| 1721   |  |  |  |  |
| 1723   |  |  |  |  |
| 1740   |  |  |  |  |
| 1807   |  |  |  |  |
| 1822   |  |  |  |  |
| 1838   |  |  |  |  |
| 1929   |  |  |  |  |
| 1946   |  |  |  |  |
| 1954   |  |  |  |  |
| 2043   |  |  |  |  |
| 2211   |  |  |  |  |



Cluster  
*Dr12*  
  
Dead cells

| Cell # | BF                                                                                   | SSC                                                                                   | Draq5                                                                                 | Ch01/Ch02/C                                                                           |
|--------|--------------------------------------------------------------------------------------|---------------------------------------------------------------------------------------|---------------------------------------------------------------------------------------|---------------------------------------------------------------------------------------|
| 174    | 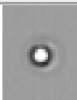    |     |     |     |
| 185    |    |    |    |    |
| 250    |    |    |    |    |
| 254    |    |    |    |    |
| 275    |    |    |    |    |
| 375    |    |    |    |    |
| 389    |    |    |    |    |
| 423    |    |    |    |    |
| 490    |    |    |    |    |
| 527    |   |   |   |   |
| 550    |  |  |  |  |
| 618    |  |  |  |  |
| 661    |  |  |  |  |
| 688    |  |  |  |  |
| 701    |  |  |  |  |
| 717    |  |  |  |  |
| 822    |  |  |  |  |
| 857    |  |  |  |  |
| 878    |  |  |  |  |
| 888    |  |  |  |  |

Cluster  
*Dr13*  
Dead cells

| Cell # | BF                                                                                   | SSC                                                                                   | Draq5                                                                                 | Ch01/Ch02/C                                                                           |
|--------|--------------------------------------------------------------------------------------|---------------------------------------------------------------------------------------|---------------------------------------------------------------------------------------|---------------------------------------------------------------------------------------|
| 73     |     |     |     |     |
| 278    |    |    |    |    |
| 282    |    |    |    |    |
| 284    |    |    |    |    |
| 325    |    |    |    |    |
| 326    |    |    |    |    |
| 441    |    |    |    |    |
| 511    |   |   |   |   |
| 585    |  |  |  |  |
| 625    |  |  |  |  |
| 677    |  |  |  |  |
| 751    |  |  |  |  |
| 903    |  |  |  |  |
| 956    |  |  |  |  |
| 987    |  |  |  |  |
| 1034   |  |  |  |  |
| 1036   |  |  |  |  |
| 1083   |  |  |  |  |
| 1196   |  |  |  |  |
| 1227   |  |  |  |  |

Cluster  
*Dr14*  
Erythrocytes

| Cell # | BF                                                                                   | SSC                                                                                   | Draq5                                                                                 | Ch01/Ch02/C                                                                           |
|--------|--------------------------------------------------------------------------------------|---------------------------------------------------------------------------------------|---------------------------------------------------------------------------------------|---------------------------------------------------------------------------------------|
| 2241   |     |     |     |     |
| 2254   |    |    |    |    |
| 2265   |    |    |    |    |
| 2295   |    |    |    |    |
| 2329   |    |    |    |    |
| 2348   |    |    |    |    |
| 2353   |    |    |    |    |
| 2415   |   |   |   |   |
| 2431   |  |  |  |  |
| 2441   |  |  |  |  |
| 2463   |  |  |  |  |
| 2554   |  |  |  |  |
| 2610   |  |  |  |  |
| 2647   |  |  |  |  |
| 2756   |  |  |  |  |
| 2770   |  |  |  |  |
| 2805   |  |  |  |  |
| 2812   |  |  |  |  |
| 2871   |  |  |  |  |
| 2888   |  |  |  |  |

Cluster  
*Dr15*

Granulocytic / Monocytic cells

| Cell # | BF                                                                                   | SSC                                                                                   | Draq5                                                                                 | Ch01/Ch02/C                                                                           |
|--------|--------------------------------------------------------------------------------------|---------------------------------------------------------------------------------------|---------------------------------------------------------------------------------------|---------------------------------------------------------------------------------------|
| 14     |     |     |     |     |
| 17     |    |    |    |    |
| 23     |    |    |    |    |
| 60     |    |    |    |    |
| 68     |    |    |    |    |
| 78     |    |    |    |    |
| 79     |    |    |    |    |
| 82     |    |    |    |    |
| 83     |   |   |   |   |
| 84     |  |  |  |  |
| 86     |  |  |  |  |
| 91     |  |  |  |  |
| 104    |  |  |  |  |
| 107    |  |  |  |  |
| 108    |  |  |  |  |
| 110    |  |  |  |  |
| 134    |  |  |  |  |
| 135    |  |  |  |  |
| 136    |  |  |  |  |
| 138    |  |  |  |  |

Cluster  
*Dr16*  
Erythrocytes

| Cell # | BF                                                                                   | SSC                                                                                   | Draq5                                                                                 | Ch01/Ch02/C                                                                           |
|--------|--------------------------------------------------------------------------------------|---------------------------------------------------------------------------------------|---------------------------------------------------------------------------------------|---------------------------------------------------------------------------------------|
| 45     |     |     |     |     |
| 72     |    |    |    |    |
| 127    |    |    |    |    |
| 156    |    |    |    |    |
| 177    |    |    |    |    |
| 187    |    |    |    |    |
| 191    |    |    |    |    |
| 210    |   |   |   |   |
| 265    |  |  |  |  |
| 332    |  |  |  |  |
| 380    |  |  |  |  |
| 398    |  |  |  |  |
| 415    |  |  |  |  |
| 457    |  |  |  |  |
| 472    |  |  |  |  |
| 525    |  |  |  |  |
| 540    |  |  |  |  |
| 576    |  |  |  |  |
| 608    |  |  |  |  |
| 620    |  |  |  |  |
