# Supplementary material for: Image3C, a multimodal image-based and label-independent integrative method for single-cell analysis
Source: eLife journal article supplement (doi:10.7554/elife.65372), 2021-07-21
Supplement: supp [file elife-65372-supp-v1.zip]

**Apple snail**  
**Homeostasis**  
**Cell Morphology**

**Cell Gallery**

Cluster  
*Pc1*  
  
Agranular large  
hemocytes

| Cell # | Ch01                                                                                | Ch06                                                                                 | Ch11                                                                                  | Ch01/Ch01                                                                             |
|--------|-------------------------------------------------------------------------------------|--------------------------------------------------------------------------------------|---------------------------------------------------------------------------------------|---------------------------------------------------------------------------------------|
| 1934   |     |     |     |     |
| 1936   |    |    |    |    |
| 1940   |    |    |    |    |
| 1943   |    |    |    |    |
| 1948   |    |    |    |    |
| 1952   |    |    |    |    |
| 1959   |    |    |    |    |
| 1960   |   |   |   |   |
| 1963   |  |  |  |  |
| 1970   |  |  |  |  |
| 1972   |  |  |  |  |
| 1977   |  |  |  |  |
| 1978   |  |  |  |  |
| 1981   |  |  |  |  |
| 1982   |  |  |  |  |
| 1984   |  |  |  |  |
| 1988   |  |  |  |  |
|        |  |  |  |  |

Cluster  
*Pc2*  
  
Intermediate  
hemocytes

| Cell # | Ch01                                                                                | Ch06                                                                                 | Ch11                                                                                  | Ch01/Ch01                                                                             |
|--------|-------------------------------------------------------------------------------------|--------------------------------------------------------------------------------------|---------------------------------------------------------------------------------------|---------------------------------------------------------------------------------------|
| 1009   | 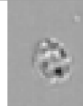    |     |     |     |
| 1016   |    |    |    |    |
| 1019   |    |    |    |    |
| 1022   |    |    |    |    |
| 1034   |    |    |    |    |
| 1082   |    |    |    |    |
| 1087   |    |    |    |    |
| 1115   |    |    |    |    |
| 1116   |  |  |  |  |
| 1123   |  |  |  |  |
| 1132   |  |  |  |  |
| 1135   |  |  |  |  |
| 1148   |  |  |  |  |
| 1154   |  |  |  |  |
| 1175   |  |  |  |  |
| 1184   |  |  |  |  |
| 1209   |  |  |  |  |
|        |                                                                                     |                                                                                      |                                                                                       |                                                                                       |

Cluster  
*Pc3*  
  
Intermediate  
hemocytes

| Cell # | Ch01                                                                                | Ch06                                                                                 | Ch11                                                                                  | Ch01/Ch01                                                                             |
|--------|-------------------------------------------------------------------------------------|--------------------------------------------------------------------------------------|---------------------------------------------------------------------------------------|---------------------------------------------------------------------------------------|
| 557    |     |     |     |     |
| 558    |    |    |    |    |
| 563    |    |    |    |    |
| 569    |    |    |    |    |
| 570    |    |    |    |    |
| 571    |    |    |    |    |
| 577    |    |    |    |    |
| 584    |   |   |   |   |
| 597    |  |  |  |  |
| 642    |  |  |  |  |
| 646    |  |  |  |  |
| 654    |  |  |  |  |
| 666    |  |  |  |  |
| 671    |  |  |  |  |
| 675    |  |  |  |  |
| 709    |  |  |  |  |
| 713    |  |  |  |  |
|        |  |  |  |  |

Cluster  
*Pc4*  
  
Blast-like  
hemocytes

| Cell # | Ch01 | Ch06 | Ch11 | Ch01/Ch01 |
|--------|------|------|------|-----------|
| 2136   |      |      |      |           |
| 2143   |      |      |      |           |
| 2147   |      |      |      |           |
| 2148   |      |      |      |           |
| 2152   |      |      |      |           |
| 2157   |      |      |      |           |
| 2159   |      |      |      |           |
| 2165   |      |      |      |           |
| 2167   |      |      |      |           |
| 2169   |      |      |      |           |
| 2177   |      |      |      |           |
| 2178   |      |      |      |           |
| 2183   |      |      |      |           |
| 2185   |      |      |      |           |
| 2195   |      |      |      |           |
| 2197   |      |      |      |           |
| 2199   |      |      |      |           |
|        |      |      |      |           |

Cluster  
*Pc5*  
  
Doublets and  
dead cells

| Cell # | Ch01 | Ch06 | Ch11 | Ch01/Ch01 |
|--------|------|------|------|-----------|
| 1157   |      |      |      |           |
| 1211   |      |      |      |           |
| 1324   |      |      |      |           |
| 1727   |      |      |      |           |
| 2325   |      |      |      |           |
| 2541   |      |      |      |           |
| 2598   |      |      |      |           |
| 2802   |      |      |      |           |
| 3058   |      |      |      |           |
| 3091   |      |      |      |           |
| 3154   |      |      |      |           |
| 3179   |      |      |      |           |
| 3332   |      |      |      |           |
| 3503   |      |      |      |           |
| 3689   |      |      |      |           |
| 3800   |      |      |      |           |
| 4241   |      |      |      |           |
|        |      |      |      |           |

Cluster  
*Pc6*  
Granular large  
hemocytes

| Cell # | Ch01                                                                                | Ch06                                                                                 | Ch11                                                                                  | Ch01/Ch01                                                                             |
|--------|-------------------------------------------------------------------------------------|--------------------------------------------------------------------------------------|---------------------------------------------------------------------------------------|---------------------------------------------------------------------------------------|
| 2929   |     |     |     |     |
| 2936   |    |    |    |    |
| 2977   |    |    |    |    |
| 2979   |    |    |    |    |
| 2980   |    |    |    |    |
| 2985   |    |    |    |    |
| 2995   |    |    |    |    |
| 3014   |   |   |   |   |
| 3015   |  |  |  |  |
| 3024   |  |  |  |  |
| 3032   |  |  |  |  |
| 3034   |  |  |  |  |
| 3051   |  |  |  |  |
| 3053   |  |  |  |  |
| 3061   |  |  |  |  |
| 3079   |  |  |  |  |
| 3104   |  |  |  |  |
|        |  |  |  |  |

Cluster  
*Pc7*  
  
Agranular large  
hemocytes

| Cell # | Ch01                                                                                | Ch06                                                                                 | Ch11                                                                                  | Ch01/Ch01                                                                             |
|--------|-------------------------------------------------------------------------------------|--------------------------------------------------------------------------------------|---------------------------------------------------------------------------------------|---------------------------------------------------------------------------------------|
| 286    |     |     |     |     |
| 287    |    |    |    |    |
| 290    |    |    |    |    |
| 305    |    |    |    |    |
| 345    |    |    |    |    |
| 384    |    |    |    |    |
| 418    |    |    |    |    |
| 419    |   |   |   |   |
| 422    |  |  |  |  |
| 431    |  |  |  |  |
| 448    |  |  |  |  |
| 455    |  |  |  |  |
| 461    |  |  |  |  |
| 480    |  |  |  |  |
| 482    |  |  |  |  |
| 493    |  |  |  |  |
| 494    |  |  |  |  |
|        |  |  |  |  |



Cluster  
*Pc8*  
  
Doublets and  
dead cells

| Cell # | Ch01                                                                                | Ch06                                                                                 | Ch11                                                                                  | Ch01/Ch01                                                                             |
|--------|-------------------------------------------------------------------------------------|--------------------------------------------------------------------------------------|---------------------------------------------------------------------------------------|---------------------------------------------------------------------------------------|
| 1207   |     |     |     |     |
| 1210   |    |    |    |    |
| 1229   |    |    |    |    |
| 1232   |    |    |    |    |
| 1254   |    |    |    |    |
| 1265   |    |    |    |    |
| 1332   |    |    |    |    |
| 1379   |   |   |   |   |
| 1474   |  |  |  |  |
| 1484   |  |  |  |  |
| 1496   |  |  |  |  |
| 1522   |  |  |  |  |
| 1524   |  |  |  |  |
| 1531   |  |  |  |  |
| 1534   |  |  |  |  |
| 1548   |  |  |  |  |
| 1633   |  |  |  |  |
|        |  |  |  |  |

Cluster  
*Pc9*

Agranular large  
hemocytes

| Cell # | Ch01                                                                                | Ch06                                                                                 | Ch11                                                                                  | Ch01/Ch01                                                                             |
|--------|-------------------------------------------------------------------------------------|--------------------------------------------------------------------------------------|---------------------------------------------------------------------------------------|---------------------------------------------------------------------------------------|
| 442    |     |     |     |     |
| 450    |    |    |    |    |
| 452    |    |    |    |    |
| 453    |    |    |    |    |
| 456    |    |    |    |    |
| 474    |    |    |    |    |
| 477    |    |    |    |    |
| 478    |   |   |   |   |
| 495    |  |  |  |  |
| 498    |  |  |  |  |
| 506    |  |  |  |  |
| 507    |  |  |  |  |
| 508    |  |  |  |  |
| 528    |  |  |  |  |
| 537    |  |  |  |  |
| 540    |  |  |  |  |
| 545    |  |  |  |  |
|        |  |  |  |  |
