# Supplementary material for: Image3C, a multimodal image-based and label-independent integrative method for single-cell analysis
Source: eLife journal article supplement (doi:10.7554/elife.65372), 2021-07-21
Supplement: supp [file elife-65372-supp-v1.zip]

**Zebrafish**  
**Phagocytosis**  
**Experiment**

**Cell Gallery**

# Dr1\_P

| Cell # | BF                                                                                  | DHR                                                                                 | SSC                                                                                 | Bac                                                                                 | Draq5                                                                                 | Ch02/Ch11/Cr                                                                          |
|--------|-------------------------------------------------------------------------------------|-------------------------------------------------------------------------------------|-------------------------------------------------------------------------------------|-------------------------------------------------------------------------------------|---------------------------------------------------------------------------------------|---------------------------------------------------------------------------------------|
| 212    |    |    |    |    |    |    |
| 276    |    |    |    |    |    |    |
| 330    |    |    |    |    |    |    |
| 364    |    |    |    |    |    |    |
| 618    |    |    |    |    |    |    |
| 776    |   |   |   |   |   |   |
| 923    |  |  |  |  |  |  |
| 937    |  |  |  |  |  |  |
| 1071   |  |  |  |  |  |  |
| 1418   |  |  |  |  |  |  |
| 1659   |  |  |  |  |  |  |
| 1848   |  |  |  |  |  |  |
| 2179   |  |  |  |  |  |  |
| 2457   |  |  |  |  |  |  |
| 2484   |  |  |  |  |  |  |

# Dr2\_P

| Cell # | BF                                                                                  | DHR                                                                                 | SSC                                                                                 | Bac                                                                                 | Draq5                                                                                 | Ch02/Ch11/Cr                                                                          |
|--------|-------------------------------------------------------------------------------------|-------------------------------------------------------------------------------------|-------------------------------------------------------------------------------------|-------------------------------------------------------------------------------------|---------------------------------------------------------------------------------------|---------------------------------------------------------------------------------------|
| 2144   |    |    |    |    |    |    |
| 2152   |    |    |    |    |    |    |
| 2334   |    |    |    |    |    |    |
| 2414   |    |    |    |    |    |    |
| 2430   |    |    |    |    |    |    |
| 2603   |    |    |    |    |    |    |
| 2794   |   |   |   |   |   |   |
| 2867   |  |  |  |  |  |  |
| 2912   |  |  |  |  |  |  |
| 2917   |  |  |  |  |  |  |
| 3066   |  |  |  |  |  |  |
| 3183   |  |  |  |  |  |  |
| 3227   |  |  |  |  |  |  |
| 3257   |  |  |  |  |  |  |
| 3320   |  |  |  |  |  |  |

# Dr3\_P

| Cell # | BF                                                                                  | DHR                                                                                 | SSC                                                                                 | Bac                                                                                 | Draq5                                                                                 | Ch02/Ch11/Cr                                                                          |
|--------|-------------------------------------------------------------------------------------|-------------------------------------------------------------------------------------|-------------------------------------------------------------------------------------|-------------------------------------------------------------------------------------|---------------------------------------------------------------------------------------|---------------------------------------------------------------------------------------|
| 517    |    |    |    |    |    |    |
| 556    |    |    |    |    |    |    |
| 572    |    |    |    |    |    |    |
| 584    |    |    |    |    |    |    |
| 624    |    |    |    |    |    |    |
| 682    |    |    |    |    |    |    |
| 689    |   |   |   |   |   |   |
| 707    |  |  |  |  |  |  |
| 730    |  |  |  |  |  |  |
| 799    |  |  |  |  |  |  |
| 811    |  |  |  |  |  |  |
| 817    |  |  |  |  |  |  |
| 864    |  |  |  |  |  |  |
| 899    |  |  |  |  |  |  |
| 968    |  |  |  |  |  |  |
|        |  |  |  |  |  |  |

Dr4\_P Professional phagocytes

| Cell # | BF                                                                                  | DHR                                                                                 | SSC                                                                                 | Bac                                                                                 | Draq5                                                                                 | Ch02/Ch11/Cr                                                                          |
|--------|-------------------------------------------------------------------------------------|-------------------------------------------------------------------------------------|-------------------------------------------------------------------------------------|-------------------------------------------------------------------------------------|---------------------------------------------------------------------------------------|---------------------------------------------------------------------------------------|
| 1102   |    |    |    |    |    |    |
| 1104   |    |    |    |    |    |    |
| 1151   |    |    |    |    |    |    |
| 1155   |    |    |    |    |    |    |
| 1162   |    |    |    |    |    |    |
| 1218   |    |    |    |    |    |    |
| 1235   |   |   |   |   |   |   |
| 1273   |  |  |  |  |  |  |
| 1322   |  |  |  |  |  |  |
| 1329   |  |  |  |  |  |  |
| 1338   |  |  |  |  |  |  |
| 1344   |  |  |  |  |  |  |
| 1377   |  |  |  |  |  |  |
| 1417   |  |  |  |  |  |  |
| 1461   |  |  |  |  |  |  |

# Dr5\_P

| Cell # | BF                                                                                  | DHR                                                                                 | SSC                                                                                 | Bac                                                                                 | Draq5                                                                                 | Ch02/Ch11/Cr                                                                          |
|--------|-------------------------------------------------------------------------------------|-------------------------------------------------------------------------------------|-------------------------------------------------------------------------------------|-------------------------------------------------------------------------------------|---------------------------------------------------------------------------------------|---------------------------------------------------------------------------------------|
| 1381   |    |    |    |    |    |    |
| 1624   |    |    |    |    |    |    |
| 1889   |    |    |    |    |    |    |
| 2189   |    |    |    |    |    |    |
| 2428   |    |    |    |    |    |    |
| 2623   |   |   |   |   |   |   |
| 2768   |  |  |  |  |  |  |
| 2863   |  |  |  |  |  |  |
| 2959   |  |  |  |  |  |  |
| 2967   |  |  |  |  |  |  |
| 2978   |  |  |  |  |  |  |
| 3105   |  |  |  |  |  |  |
| 3142   |  |  |  |  |  |  |
| 3162   |  |  |  |  |  |  |
| 3245   |  |  |  |  |  |  |
|        |  |  |  |  |  |  |

# Dr6\_P

| Cell # | BF                                                                                  | DHR                                                                                 | SSC                                                                                 | Bac                                                                                 | Draq5                                                                                 | Ch02/Ch11/Cr                                                                          |
|--------|-------------------------------------------------------------------------------------|-------------------------------------------------------------------------------------|-------------------------------------------------------------------------------------|-------------------------------------------------------------------------------------|---------------------------------------------------------------------------------------|---------------------------------------------------------------------------------------|
| 4559   |    |    |    |    |    |    |
| 4594   |    |    |    |    |    |    |
| 4677   |    |    |    |    |    |    |
| 5030   |    |    |    |    |    |    |
| 5314   |    |    |    |    |    |    |
| 5373   |   |   |   |   |   |   |
| 5936   |  |  |  |  |  |  |
| 6023   |  |  |  |  |  |  |
| 6285   |  |  |  |  |  |  |
| 6864   |  |  |  |  |  |  |
| 6929   |  |  |  |  |  |  |
| 7018   |  |  |  |  |  |  |
| 7094   |  |  |  |  |  |  |
| 7234   |  |  |  |  |  |  |
| 7300   |  |  |  |  |  |  |

# Dr7\_P

| Cell # | BF                                                                                  | DHR                                                                                 | SSC                                                                                 | Bac                                                                                 | Draq5                                                                                 | Ch02/Ch11/Cr                                                                          |
|--------|-------------------------------------------------------------------------------------|-------------------------------------------------------------------------------------|-------------------------------------------------------------------------------------|-------------------------------------------------------------------------------------|---------------------------------------------------------------------------------------|---------------------------------------------------------------------------------------|
| 1383   |    |    |    |    |    |    |
| 1388   |    |    |    |    |    |    |
| 1804   |    |    |    |    |    |    |
| 1886   |    |    |    |    |    |    |
| 1887   |    |    |    |    |    |    |
| 1897   |    |    |    |    |    |    |
| 1963   |   |   |   |   |   |   |
| 1971   |  |  |  |  |  |  |
| 1980   |  |  |  |  |  |  |
| 2035   |  |  |  |  |  |  |
| 2124   |  |  |  |  |  |  |
| 2214   |  |  |  |  |  |  |
| 2485   |  |  |  |  |  |  |
| 2513   |  |  |  |  |  |  |
| 2676   |  |  |  |  |  |  |



# Dr8\_P

| Cell # | BF                                                                                  | DHR                                                                                 | SSC                                                                                 | Bac                                                                                 | Draq5                                                                                 | Ch02/Ch11/Ct                                                                          |
|--------|-------------------------------------------------------------------------------------|-------------------------------------------------------------------------------------|-------------------------------------------------------------------------------------|-------------------------------------------------------------------------------------|---------------------------------------------------------------------------------------|---------------------------------------------------------------------------------------|
| 351    |    |    |    |    |    |    |
| 354    |    |    |    |    |    |    |
| 367    |    |    |    |    |    |    |
| 416    |    |    |    |    |    |    |
| 428    |    |    |    |    |    |    |
| 481    |   |   |   |   |   |   |
| 504    |  |  |  |  |  |  |
| 512    |  |  |  |  |  |  |
| 526    |  |  |  |  |  |  |
| 531    |  |  |  |  |  |  |
| 535    |  |  |  |  |  |  |
| 589    |  |  |  |  |  |  |
| 596    |  |  |  |  |  |  |
| 665    |  |  |  |  |  |  |
| 717    |  |  |  |  |  |  |

# Dr9\_P

| Cell # | BF                                                                                  | DHR                                                                                 | SSC                                                                                 | Bac                                                                                 | Draq5                                                                                 | Ch02/Ch11/Cr                                                                          |
|--------|-------------------------------------------------------------------------------------|-------------------------------------------------------------------------------------|-------------------------------------------------------------------------------------|-------------------------------------------------------------------------------------|---------------------------------------------------------------------------------------|---------------------------------------------------------------------------------------|
| 1750   |    |    |    |    |    |    |
| 1785   |    |    |    |    |    |    |
| 1795   |    |    |    |    |    |    |
| 1893   |    |    |    |    |    |    |
| 1908   |    |    |    |    |    |    |
| 2289   |   |   |   |   |   |   |
| 2350   |  |  |  |  |  |  |
| 2434   |  |  |  |  |  |  |
| 2948   |  |  |  |  |  |  |
| 2996   |  |  |  |  |  |  |
| 3017   |  |  |  |  |  |  |
| 3174   |  |  |  |  |  |  |
| 3352   |  |  |  |  |  |  |
| 3473   |  |  |  |  |  |  |
| 3619   |  |  |  |  |  |  |
|        |  |  |  |  |  |  |

# Dr10\_P

| Cell # | BF                                                                                  | DHR                                                                                 | SSC                                                                                 | Bac                                                                                 | Draq5                                                                                 | Ch02/Ch11/Ct                                                                          |
|--------|-------------------------------------------------------------------------------------|-------------------------------------------------------------------------------------|-------------------------------------------------------------------------------------|-------------------------------------------------------------------------------------|---------------------------------------------------------------------------------------|---------------------------------------------------------------------------------------|
| 2393   |    |    |    |    |    |    |
| 2422   |    |    |    |    |    |    |
| 2568   |    |    |    |    |    |    |
| 2573   |    |    |    |    |    |    |
| 2588   |    |    |    |    |    |    |
| 2662   |   |   |   |   |   |   |
| 2675   |  |  |  |  |  |  |
| 2720   |  |  |  |  |  |  |
| 2790   |  |  |  |  |  |  |
| 2820   |  |  |  |  |  |  |
| 2834   |  |  |  |  |  |  |
| 2857   |  |  |  |  |  |  |
| 2916   |  |  |  |  |  |  |
| 3002   |  |  |  |  |  |  |
| 3068   |  |  |  |  |  |  |

# Dr11\_P

| Cell # | BF                                                                                  | DHR                                                                                 | SSC                                                                                 | Bac                                                                                 | Draq5                                                                                 | Ch02/Ch11/Cf                                                                          |
|--------|-------------------------------------------------------------------------------------|-------------------------------------------------------------------------------------|-------------------------------------------------------------------------------------|-------------------------------------------------------------------------------------|---------------------------------------------------------------------------------------|---------------------------------------------------------------------------------------|
| 5203   |    |    |    |    |    |    |
| 5256   |    |    |    |    |    |    |
| 5264   |    |    |    |    |    |    |
| 5268   |    |    |    |    |    |    |
| 5378   |    |    |    |    |    |    |
| 5402   |    |    |    |    |    |    |
| 5508   |   |   |   |   |   |   |
| 5721   |  |  |  |  |  |  |
| 5795   |  |  |  |  |  |  |
| 5863   |  |  |  |  |  |  |
| 6072   |  |  |  |  |  |  |
| 6133   |  |  |  |  |  |  |
| 6141   |  |  |  |  |  |  |
| 6263   |  |  |  |  |  |  |
| 6701   |  |  |  |  |  |  |

# Dr12\_P Professional phagocytes

| Cell # | BF                                                                                  | DHR                                                                                 | SSC                                                                                 | Bac                                                                                 | Draq5                                                                                 | Ch02/Ch11/Cr                                                                          |
|--------|-------------------------------------------------------------------------------------|-------------------------------------------------------------------------------------|-------------------------------------------------------------------------------------|-------------------------------------------------------------------------------------|---------------------------------------------------------------------------------------|---------------------------------------------------------------------------------------|
| 1180   |    |    |    |    |    |    |
| 1299   |    |    |    |    |    |    |
| 1342   |    |    |    |    |    |    |
| 1365   |    |    |    |    |    |    |
| 1395   |    |    |    |    |    |    |
| 1813   |    |    |    |    |    |    |
| 1816   |   |   |   |   |   |   |
| 1850   |  |  |  |  |  |  |
| 1925   |  |  |  |  |  |  |
| 1936   |  |  |  |  |  |  |
| 1973   |  |  |  |  |  |  |
| 2094   |  |  |  |  |  |  |
| 2126   |  |  |  |  |  |  |
| 2249   |  |  |  |  |  |  |
| 2259   |  |  |  |  |  |  |

Dr13\_P Professional phagocytes

| Cell # | BF                                                                                  | DHR                                                                                 | SSC                                                                                 | Bac                                                                                 | Draq5                                                                                 | Ch02/Ch11/Cr                                                                          |
|--------|-------------------------------------------------------------------------------------|-------------------------------------------------------------------------------------|-------------------------------------------------------------------------------------|-------------------------------------------------------------------------------------|---------------------------------------------------------------------------------------|---------------------------------------------------------------------------------------|
| 1579   |    |    |    |    |    |    |
| 1717   |    |    |    |    |    |    |
| 1780   |    |    |    |    |    |    |
| 1794   |    |    |    |    |    |    |
| 1797   |    |    |    |    |    |    |
| 1880   |   |   |   |   |   |   |
| 1927   |  |  |  |  |  |  |
| 1940   |  |  |  |  |  |  |
| 1987   |  |  |  |  |  |  |
| 2000   |  |  |  |  |  |  |
| 2001   |  |  |  |  |  |  |
| 2019   |  |  |  |  |  |  |
| 2171   |  |  |  |  |  |  |
| 2268   |  |  |  |  |  |  |
| 2339   |  |  |  |  |  |  |
|        |  |  |  |  |  |  |

# Dr14\_P

| Cell # | BF                                                                                  | DHR                                                                                 | SSC                                                                                 | Bac                                                                                 | Draq5                                                                                | Ch02/Ch11/Ct                                                                          |
|--------|-------------------------------------------------------------------------------------|-------------------------------------------------------------------------------------|-------------------------------------------------------------------------------------|-------------------------------------------------------------------------------------|--------------------------------------------------------------------------------------|---------------------------------------------------------------------------------------|
| 2140   |    |    |    |    |    |    |
| 2506   |    |    |    |    |    |    |
| 2935   |    |    |    |    |    |    |
| 4909   |    |    |    |    |    |    |
| 5544   |    |    |    |    |    |    |
| 7015   |    |    |    |    |    |    |
| 7945   |  |  |  |  |  |  |
| 7990   |  |  |  |  |  |  |
| 9363   |  |  |  |  |  |  |

# Dr15\_P

| Cell # | BF                                                                                  | DHR                                                                                 | SSC                                                                                 | Bac                                                                                 | Draq5                                                                                 | Ch02/Ch11/Ct                                                                          |
|--------|-------------------------------------------------------------------------------------|-------------------------------------------------------------------------------------|-------------------------------------------------------------------------------------|-------------------------------------------------------------------------------------|---------------------------------------------------------------------------------------|---------------------------------------------------------------------------------------|
| 673    | 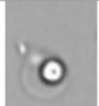   |    |    |    |    |    |
| 960    |    |    |    |    |    |    |
| 1420   |    |    |    |    |    |    |
| 1463   |    |    |    |    |    |    |
| 1787   |    |    |    |    |    |    |
| 1788   |   |   |   |   |   |   |
| 2216   |  |  |  |  |  |  |
| 2220   |  |  |  |  |  |  |
| 2271   |  |  |  |  |  |  |
| 2619   |  |  |  |  |  |  |
| 2755   |  |  |  |  |  |  |
| 2814   |  |  |  |  |  |  |
| 2966   |  |  |  |  |  |  |
| 3022   |  |  |  |  |  |  |
| 3096   |  |  |  |  |  |  |
|        |  |  |  |  |  |  |



# Dr16\_P

| Cell # | BF                                                                                  | DHR                                                                                 | SSC                                                                                 | Bac                                                                                 | Draq5                                                                                 | Ch02/Ch11/Ct                                                                          |
|--------|-------------------------------------------------------------------------------------|-------------------------------------------------------------------------------------|-------------------------------------------------------------------------------------|-------------------------------------------------------------------------------------|---------------------------------------------------------------------------------------|---------------------------------------------------------------------------------------|
| 1307   |    |    |    |    |    |    |
| 1337   |    |    |    |    |    |    |
| 1361   |    |    |    |    |    |    |
| 1384   |    |    |    |    |    |    |
| 1432   |    |    |    |    |    |    |
| 1519   |  |  |  |  |  |  |
| 1525   |  |  |  |  |  |  |
| 1678   |  |  |  |  |  |  |
| 1697   |  |  |  |  |  |  |
| 1770   |  |  |  |  |  |  |
| 1847   |  |  |  |  |  |  |
| 1926   |  |  |  |  |  |  |
| 2061   |  |  |  |  |  |  |
| 2083   |  |  |  |  |  |  |
| 2302   |  |  |  |  |  |  |
|        |  |  |  |  |  |  |

Dr17\_P

| Cell # | BF                                                                                  | DHR                                                                                 | SSC                                                                                 | Bac                                                                                  | Draq5                                                                                 | Ch02/Ch1                                                                              |
|--------|-------------------------------------------------------------------------------------|-------------------------------------------------------------------------------------|-------------------------------------------------------------------------------------|--------------------------------------------------------------------------------------|---------------------------------------------------------------------------------------|---------------------------------------------------------------------------------------|
| 7701   |    |    |    |    |    |    |
| 7703   |    |    |    |    |    |    |
| 7711   |    |    |    |    |    |    |
| 7713   |    |    |    |    |    |    |
| 7730   |    |    |    |    |    |    |
| 7841   |    |    |    |    |    |    |
| 7888   |    |    |    |    |    |    |
| 7914   |   |   |   |   |   |   |
| 7919   |  |  |  |  |  |  |
| 7943   |  |  |  |  |  |  |
| 7950   |  |  |  |  |  |  |
| 7962   |  |  |  |  |  |  |
| 7993   |  |  |  |  |  |  |
| 8142   |  |  |  |  |  |  |
| 8144   |  |  |  |  |  |  |
| 8202   |  |  |  |  |  |  |
| 8213   |  |  |  |  |  |  |
| 8281   |  |  |  |  |  |  |
| 8321   |  |  |  |  |  |  |

# Dr18\_P

| Cell # | BF                                                                                  | DHR                                                                                 | SSC                                                                                 | Bac                                                                                 | Draq5                                                                                 | Ch02/Ch11/Cr                                                                          |
|--------|-------------------------------------------------------------------------------------|-------------------------------------------------------------------------------------|-------------------------------------------------------------------------------------|-------------------------------------------------------------------------------------|---------------------------------------------------------------------------------------|---------------------------------------------------------------------------------------|
| 112    |    |    |    |    |    |    |
| 116    |    |    |    |    |    |    |
| 118    |    |    |    |    |    |    |
| 141    |    |    |    |    |    |    |
| 200    |    |    |    |    |    |    |
| 232    |    |    |    |    |    |    |
| 264    |   |   |   |   |   |   |
| 265    |  |  |  |  |  |  |
| 268    |  |  |  |  |  |  |
| 290    |  |  |  |  |  |  |
| 303    |  |  |  |  |  |  |
| 306    |  |  |  |  |  |  |
| 309    |  |  |  |  |  |  |
| 312    |  |  |  |  |  |  |
| 325    |  |  |  |  |  |  |
|        |  |  |  |  |  |  |

# Dr19\_P

| Cell # | BF                                                                                  | DHR                                                                                 | SSC                                                                                 | Bac                                                                                 | Draq5                                                                                 | Ch02/Ch11/Ct                                                                          |
|--------|-------------------------------------------------------------------------------------|-------------------------------------------------------------------------------------|-------------------------------------------------------------------------------------|-------------------------------------------------------------------------------------|---------------------------------------------------------------------------------------|---------------------------------------------------------------------------------------|
| 2071   |    |    |    |    |    |    |
| 2141   |    |    |    |    |    |    |
| 2146   |    |    |    |    |    |    |
| 2238   |    |    |    |    |    |    |
| 2310   |    |    |    |    |    |    |
| 2358   |    |    |    |    |    |    |
| 2362   |   |   |   |   |   |   |
| 2380   |  |  |  |  |  |  |
| 2418   |  |  |  |  |  |  |
| 2451   |  |  |  |  |  |  |
| 2474   |  |  |  |  |  |  |
| 2479   |  |  |  |  |  |  |
| 2531   |  |  |  |  |  |  |
| 2669   |  |  |  |  |  |  |
| 2726   |  |  |  |  |  |  |

# Dr20\_P

| Cell # | BF                                                                                  | DHR                                                                                 | SSC                                                                                 | Bac                                                                                 | Draq5                                                                                | Ch02/Ch11/Ct                                                                          |
|--------|-------------------------------------------------------------------------------------|-------------------------------------------------------------------------------------|-------------------------------------------------------------------------------------|-------------------------------------------------------------------------------------|--------------------------------------------------------------------------------------|---------------------------------------------------------------------------------------|
| 3369   | 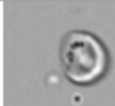   |    |    |    |    |    |
| 3437   |    |    |    |    |    |    |
| 3495   |    |    |    |    |    |    |
| 3612   |    |    |    |    |    |    |
| 3844   |    |    |    |    |    |    |
| 3862   |    |    |    |    |    |    |
| 3916   |   |   |   |   |   |   |
| 4319   |  |  |  |  |  |  |
| 4395   |  |  |  |  |  |  |
| 4442   |  |  |  |  |  |  |
| 4545   |  |  |  |  |  |  |
| 4736   |  |  |  |  |  |  |
| 4764   |  |  |  |  |  |  |
| 4980   |  |  |  |  |  |  |
| 5056   |  |  |  |  |  |  |

# Dr21\_P Professional phagocytes

| Cell # | BF                                                                                  | DHR                                                                                 | SSC                                                                                 | Bac                                                                                 | Draq5                                                                                 | Ch02/Ch11/Cr                                                                          |
|--------|-------------------------------------------------------------------------------------|-------------------------------------------------------------------------------------|-------------------------------------------------------------------------------------|-------------------------------------------------------------------------------------|---------------------------------------------------------------------------------------|---------------------------------------------------------------------------------------|
| 819    |    |    |    |    |    |    |
| 975    |    |    |    |    |    |    |
| 995    |    |    |    |    |    |    |
| 1111   |    |    |    |    |    |    |
| 1347   |    |    |    |    |    |    |
| 1403   |   |   |   |   |   |   |
| 1545   |  |  |  |  |  |  |
| 1800   |  |  |  |  |  |  |
| 1951   |  |  |  |  |  |  |
| 2378   |  |  |  |  |  |  |
| 2500   |  |  |  |  |  |  |
| 2884   |  |  |  |  |  |  |
| 3395   |  |  |  |  |  |  |
| 3716   |  |  |  |  |  |  |
| 3875   |  |  |  |  |  |  |
|        |  |  |  |  |  |  |

# Dr22\_P

| Cell # | BF                                                                                  | DHR                                                                                 | SSC                                                                                 | Bac                                                                                 | Draq5                                                                                | Ch02/Ch11/Cr                                                                          |
|--------|-------------------------------------------------------------------------------------|-------------------------------------------------------------------------------------|-------------------------------------------------------------------------------------|-------------------------------------------------------------------------------------|--------------------------------------------------------------------------------------|---------------------------------------------------------------------------------------|
| 191    |    |    |    |    |    |    |
| 194    |    |    |    |    |    |    |
| 197    |    |    |    |    |    |    |
| 203    |    |    |    |    |    |    |
| 231    |    |    |    |    |    |    |
| 249    |    |    |    |    |    |    |
| 253    |   |   |   |   |   |   |
| 262    |  |  |  |  |  |  |
| 267    |  |  |  |  |  |  |
| 269    |  |  |  |  |  |  |
| 271    |  |  |  |  |  |  |
| 273    |  |  |  |  |  |  |
| 277    |  |  |  |  |  |  |
| 283    |  |  |  |  |  |  |
| 284    |  |  |  |  |  |  |

# Dr23\_P

| Cell # | BF                                                                                  | DHR                                                                                 | SSC                                                                                 | Bac                                                                                 | Draq5                                                                                 | Ch02/Ch11/Ct                                                                          |
|--------|-------------------------------------------------------------------------------------|-------------------------------------------------------------------------------------|-------------------------------------------------------------------------------------|-------------------------------------------------------------------------------------|---------------------------------------------------------------------------------------|---------------------------------------------------------------------------------------|
| 479    |    |    |    |    |    |    |
| 484    |    |    |    |    |    |    |
| 496    |    |    |    |    |    |    |
| 500    |    |    |    |    |    |    |
| 501    |    |    |    |    |    |    |
| 516    |   |   |   |   |   |   |
| 522    |  |  |  |  |  |  |
| 547    |  |  |  |  |  |  |
| 552    |  |  |  |  |  |  |
| 591    |  |  |  |  |  |  |
| 594    |  |  |  |  |  |  |
| 595    |  |  |  |  |  |  |
| 617    |  |  |  |  |  |  |
| 635    |  |  |  |  |  |  |
| 636    |  |  |  |  |  |  |
|        |  |  |  |  |  |  |



# Dr24\_P

| Cell # | BF                                                                                  | DHR                                                                                 | SSC                                                                                 | Bac                                                                                 | Draq5                                                                                 | Ch02/Ch11/Cr                                                                          |
|--------|-------------------------------------------------------------------------------------|-------------------------------------------------------------------------------------|-------------------------------------------------------------------------------------|-------------------------------------------------------------------------------------|---------------------------------------------------------------------------------------|---------------------------------------------------------------------------------------|
| 559    |    |    |    |    |    |    |
| 560    |    |    |    |    |    |    |
| 561    |    |    |    |    |    |    |
| 568    |    |    |    |    |    |    |
| 575    |    |    |    |    |    |    |
| 579    |   |   |   |   |   |   |
| 581    |  |  |  |  |  |  |
| 586    |  |  |  |  |  |  |
| 592    |  |  |  |  |  |  |
| 621    |  |  |  |  |  |  |
| 623    |  |  |  |  |  |  |
| 628    |  |  |  |  |  |  |
| 644    |  |  |  |  |  |  |
| 648    |  |  |  |  |  |  |
| 649    |  |  |  |  |  |  |
|        |  |  |  |  |  |  |

# Dr25\_P

| Cell # | BF                                                                                  | DHR                                                                                 | SSC                                                                                 | Bac                                                                                 | Draq5                                                                                | Ch02/Ch11/Ct                                                                          |
|--------|-------------------------------------------------------------------------------------|-------------------------------------------------------------------------------------|-------------------------------------------------------------------------------------|-------------------------------------------------------------------------------------|--------------------------------------------------------------------------------------|---------------------------------------------------------------------------------------|
| 820    |    |    |    |    |    |    |
| 874    |    |    |    |    |    |    |
| 878    |    |    |    |    |    |    |
| 893    |    |    |    |    |    |    |
| 976    |    |    |    |    |    |    |
| 1411   |   |   |   |   |   |   |
| 1413   |  |  |  |  |  |  |
| 1459   |  |  |  |  |  |  |
| 1611   |  |  |  |  |  |  |
| 1723   |  |  |  |  |  |  |
| 1945   |  |  |  |  |  |  |
| 1970   |  |  |  |  |  |  |
| 2159   |  |  |  |  |  |  |
| 2160   |  |  |  |  |  |  |
| 2529   |  |  |  |  |  |  |
|        |  |  |  |  |  |  |

# Dr26\_P

| Cell # | BF                                                                                  | DHR                                                                                 | SSC                                                                                 | Bac                                                                                 | Draq5                                                                                 | Ch02/Ch11/Ct                                                                          |
|--------|-------------------------------------------------------------------------------------|-------------------------------------------------------------------------------------|-------------------------------------------------------------------------------------|-------------------------------------------------------------------------------------|---------------------------------------------------------------------------------------|---------------------------------------------------------------------------------------|
| 4825   |    |    |    |    |    |    |
| 4831   |    |    |    |    |    |    |
| 4837   |    |    |    |    |    |    |
| 4848   |    |    |    |    |    |    |
| 4852   |    |    |    |    |    |    |
| 4853   |   |   |   |   |   |   |
| 4866   |  |  |  |  |  |  |
| 4870   |  |  |  |  |  |  |
| 4871   |  |  |  |  |  |  |
| 4874   |  |  |  |  |  |  |
| 4875   |  |  |  |  |  |  |
| 4876   |  |  |  |  |  |  |
| 4886   |  |  |  |  |  |  |
| 4890   |  |  |  |  |  |  |
| 4894   |  |  |  |  |  |  |
|        |  |  |  |  |  |  |
