# Supplementary material for: Image3C, a multimodal image-based and label-independent integrative method for single-cell analysis
Source: eLife journal article supplement (doi:10.7554/elife.65372), 2021-07-21
Supplement: supp [file elife-65372-supp-v1.zip]

# **Apple snail Phagocytosis Experiment**

## **Cell Gallery**

# Pc1\_P

| Cell # | Ch01                                                                                | Ch02                                                                                | Ch06                                                                                | Ch07                                                                                | Ch11                                                                                  | Ch02/Ch11/Ct                                                                          |
|--------|-------------------------------------------------------------------------------------|-------------------------------------------------------------------------------------|-------------------------------------------------------------------------------------|-------------------------------------------------------------------------------------|---------------------------------------------------------------------------------------|---------------------------------------------------------------------------------------|
| 690    |    |    |    |    |    |    |
| 700    |    |    |    |    |    |    |
| 706    |    |    |    |    |    |    |
| 707    |    |    |    |    |    |    |
| 723    |    |    |    |    |    |    |
| 726    |    |    |    |    |    |    |
| 762    |   |   |   |   |   |   |
| 778    |  |  |  |  |  |  |
| 781    |  |  |  |  |  |  |
| 825    |  |  |  |  |  |  |
| 830    |  |  |  |  |  |  |
| 833    |  |  |  |  |  |  |
| 837    |  |  |  |  |  |  |
| 854    |  |  |  |  |  |  |
| 855    |  |  |  |  |  |  |

# Pc2\_P

| Cell # | Ch01                                                                                | Ch02                                                                                | Ch06                                                                                | Ch07                                                                                | Ch11                                                                                  | Ch02/Ch11/Ct                                                                          |
|--------|-------------------------------------------------------------------------------------|-------------------------------------------------------------------------------------|-------------------------------------------------------------------------------------|-------------------------------------------------------------------------------------|---------------------------------------------------------------------------------------|---------------------------------------------------------------------------------------|
| 445    | 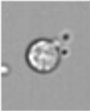   |    |    |    |    |    |
| 453    |    |    |    |    |    |    |
| 464    |    |    |    |    |    |    |
| 485    |    |    |    |    |    |    |
| 500    |    |    |    |    |    |    |
| 510    |    |    |    |    |    |    |
| 514    |   |   |   |   |   |   |
| 569    |  |  |  |  |  |  |
| 588    |  |  |  |  |  |  |
| 593    |  |  |  |  |  |  |
| 608    |  |  |  |  |  |  |
| 651    |  |  |  |  |  |  |
| 686    |  |  |  |  |  |  |
| 698    |  |  |  |  |  |  |
| 709    |  |  |  |  |  |  |
|        |  |  |  |  |  |  |

# *Pc3\_P*

| Cell # | Ch01                                                                                | Ch02                                                                                | Ch06                                                                                | Ch07                                                                                | Ch11                                                                                  | Ch02/Ch11/Ct                                                                          |
|--------|-------------------------------------------------------------------------------------|-------------------------------------------------------------------------------------|-------------------------------------------------------------------------------------|-------------------------------------------------------------------------------------|---------------------------------------------------------------------------------------|---------------------------------------------------------------------------------------|
| 2588   |    |    |    |    |    |    |
| 2632   |    |    |    |    |    |    |
| 2665   |    |    |    |    |    |    |
| 2748   |    |    |    |    |    |    |
| 2769   |    |    |    |    |    |    |
| 2814   |    |    |    |    |    |    |
| 2982   |  |  |  |  |  |  |
| 3243   |  |  |  |  |  |  |
| 3305   |  |  |  |  |  |  |
| 3375   |  |  |  |  |  |  |
| 3489   |  |  |  |  |  |  |
| 3567   |  |  |  |  |  |  |
| 3651   |  |  |  |  |  |  |
| 3668   |  |  |  |  |  |  |
| 3795   |  |  |  |  |  |  |

Pc4\_P

| Cell # | Ch01                                                                              | Ch02                                                                              | Ch06                                                                              | Ch07                                                                              | Ch11                                                                                | Ch02/Ch11/Ct                                                                        |
|--------|-----------------------------------------------------------------------------------|-----------------------------------------------------------------------------------|-----------------------------------------------------------------------------------|-----------------------------------------------------------------------------------|-------------------------------------------------------------------------------------|-------------------------------------------------------------------------------------|
| 1235   |  |  |  |  |  |  |
| 5722   |  |  |  |  |  |  |
| 7916   |  |  |  |  |  |  |
| 8446   |  |  |  |  |  |  |

# *Pc5\_P* Professional phagocytes

| Cell # | Ch01                                                                                | Ch02                                                                                | Ch06                                                                                | Ch07                                                                                | Ch11                                                                                  | Ch02/Ch11/Ct                                                                          |
|--------|-------------------------------------------------------------------------------------|-------------------------------------------------------------------------------------|-------------------------------------------------------------------------------------|-------------------------------------------------------------------------------------|---------------------------------------------------------------------------------------|---------------------------------------------------------------------------------------|
| 3400   |    |    |    |    |    |    |
| 3433   |    |    |    |    |    |    |
| 3462   |    |    |    |    |    |    |
| 4391   |    |    |    |    |    |    |
| 4449   |    |    |    |    |    |    |
| 4499   |    |    |    |    |    |    |
| 4503   |  |  |  |  |  |  |
| 4644   |  |  |  |  |  |  |
| 4794   |  |  |  |  |  |  |
| 4827   |  |  |  |  |  |  |
| 5372   |  |  |  |  |  |  |
| 5378   |  |  |  |  |  |  |
| 5451   |  |  |  |  |  |  |
| 5917   |  |  |  |  |  |  |
| 6193   |  |  |  |  |  |  |

# Pc6\_P

| Cell # | Ch01                                                                                | Ch02                                                                                | Ch06                                                                                | Ch07                                                                                | Ch11                                                                                  | Ch02/Ch11/Ct                                                                          |
|--------|-------------------------------------------------------------------------------------|-------------------------------------------------------------------------------------|-------------------------------------------------------------------------------------|-------------------------------------------------------------------------------------|---------------------------------------------------------------------------------------|---------------------------------------------------------------------------------------|
| 127    | 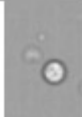   |    |    |    |    |    |
| 136    |    |    |    |    |    |    |
| 189    |    |    |    |    |    |    |
| 223    |    |    |    |    |    |    |
| 237    |    |    |    |    |    |    |
| 248    |    |    |    |    |    |    |
| 258    |   |   |   |   |   |   |
| 287    |  |  |  |  |  |  |
| 332    |  |  |  |  |  |  |
| 340    |  |  |  |  |  |  |
| 350    |  |  |  |  |  |  |
| 405    |  |  |  |  |  |  |
| 429    |  |  |  |  |  |  |
| 438    |  |  |  |  |  |  |
| 471    |  |  |  |  |  |  |

# Pc7\_P

| Cell # | Ch01                                                                                | Ch02                                                                                | Ch06                                                                                | Ch07                                                                                | Ch11                                                                                  | Ch02/Ch11/Ct                                                                          |
|--------|-------------------------------------------------------------------------------------|-------------------------------------------------------------------------------------|-------------------------------------------------------------------------------------|-------------------------------------------------------------------------------------|---------------------------------------------------------------------------------------|---------------------------------------------------------------------------------------|
| 291    |    |    |    |    |    |    |
| 304    |    |    |    |    |    |    |
| 339    |    |    |    |    |    |    |
| 344    |    |    |    |    |    |    |
| 361    |    |    |    |    |    |    |
| 364    |    |    |    |    |    |    |
| 376    |   |   |   |   |   |   |
| 384    |  |  |  |  |  |  |
| 426    |  |  |  |  |  |  |
| 439    |  |  |  |  |  |  |
| 444    |  |  |  |  |  |  |
| 452    |  |  |  |  |  |  |
| 477    |  |  |  |  |  |  |
| 496    |  |  |  |  |  |  |
| 509    |  |  |  |  |  |  |
|        |  |  |  |  |  |  |



# *Pc8\_P*

| Cell # | Ch01                                                                                | Ch02                                                                                | Ch06                                                                                | Ch07                                                                                | Ch11                                                                                  | Ch02/Ch11/Ct                                                                          |
|--------|-------------------------------------------------------------------------------------|-------------------------------------------------------------------------------------|-------------------------------------------------------------------------------------|-------------------------------------------------------------------------------------|---------------------------------------------------------------------------------------|---------------------------------------------------------------------------------------|
| 1565   | 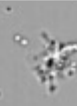   |    |    |    |    |    |
| 1566   |    |    |    |    |    |    |
| 1629   |    |    |    |    |    |    |
| 1695   |    |    |    |    |    |    |
| 1756   |    |    |    |    |    |    |
| 1764   |    |    |    |    |    |    |
| 1858   |   |   |   |   |   |   |
| 1940   |  |  |  |  |  |  |
| 1958   |  |  |  |  |  |  |
| 2130   |  |  |  |  |  |  |
| 2260   |  |  |  |  |  |  |
| 2266   |  |  |  |  |  |  |
| 2372   |  |  |  |  |  |  |
| 2695   |  |  |  |  |  |  |
| 2780   |  |  |  |  |  |  |

# Pc9\_P

| Cell # | Ch01                                                                                | Ch02                                                                                | Ch06                                                                                | Ch07                                                                                | Ch11                                                                                  | Ch02/Ch11/Ct                                                                          |
|--------|-------------------------------------------------------------------------------------|-------------------------------------------------------------------------------------|-------------------------------------------------------------------------------------|-------------------------------------------------------------------------------------|---------------------------------------------------------------------------------------|---------------------------------------------------------------------------------------|
| 1247   |    |    |    |    |    |    |
| 1268   |    |    |    |    |    |    |
| 1281   |    |    |    |    |    |    |
| 1309   |    |    |    |    |    |    |
| 1348   |    |    |    |    |    |    |
| 1360   |    |    |    |    |    |    |
| 1568   |   |   |   |   |   |   |
| 1644   |  |  |  |  |  |  |
| 1734   |  |  |  |  |  |  |
| 1743   |  |  |  |  |  |  |
| 1903   |  |  |  |  |  |  |
| 1914   |  |  |  |  |  |  |
| 1920   |  |  |  |  |  |  |
| 1927   |  |  |  |  |  |  |
| 1991   |  |  |  |  |  |  |
|        |  |  |  |  |  |  |

# Pc10\_P

| Cell # | Ch01                                                                                | Ch02                                                                                | Ch06                                                                                | Ch07                                                                                | Ch11                                                                                  | Ch02/Ch11/Ct                                                                          |
|--------|-------------------------------------------------------------------------------------|-------------------------------------------------------------------------------------|-------------------------------------------------------------------------------------|-------------------------------------------------------------------------------------|---------------------------------------------------------------------------------------|---------------------------------------------------------------------------------------|
| 570    |    |    |    |    |    |    |
| 606    |    |    |    |    |    |    |
| 628    |    |    |    |    |    |    |
| 629    |    |    |    |    |    |    |
| 633    |    |    |    |    |    |    |
| 640    |   |   |   |   |   |   |
| 645    |  |  |  |  |  |  |
| 655    |  |  |  |  |  |  |
| 665    |  |  |  |  |  |  |
| 669    |  |  |  |  |  |  |
| 699    |  |  |  |  |  |  |
| 701    |  |  |  |  |  |  |
| 715    |  |  |  |  |  |  |
| 717    |  |  |  |  |  |  |
| 721    |  |  |  |  |  |  |
|        |  |  |  |  |  |  |

# *Pc11\_P*

| Cell # | Ch01                                                                                | Ch02                                                                                | Ch06                                                                                | Ch07                                                                                | Ch11                                                                                  | Ch02/Ch11/Ct                                                                          |
|--------|-------------------------------------------------------------------------------------|-------------------------------------------------------------------------------------|-------------------------------------------------------------------------------------|-------------------------------------------------------------------------------------|---------------------------------------------------------------------------------------|---------------------------------------------------------------------------------------|
| 111    |    |    |    |    |    |    |
| 112    |    |    |    |    |    |    |
| 116    |    |    |    |    |    |    |
| 123    |    |    |    |    |    |    |
| 125    |    |    |    |    |    |    |
| 132    |    |    |    |    |    |    |
| 165    |   |   |   |   |   |   |
| 176    |  |  |  |  |  |  |
| 181    |  |  |  |  |  |  |
| 205    |  |  |  |  |  |  |
| 217    |  |  |  |  |  |  |
| 233    |  |  |  |  |  |  |
| 241    |  |  |  |  |  |  |
| 264    |  |  |  |  |  |  |
| 299    |  |  |  |  |  |  |
|        |  |  |  |  |  |  |

# Pc12\_P

| Cell # | Ch01                                                                                | Ch02                                                                                | Ch06                                                                                | Ch07                                                                                | Ch11                                                                                  | Ch02/Ch11/Ct                                                                          |
|--------|-------------------------------------------------------------------------------------|-------------------------------------------------------------------------------------|-------------------------------------------------------------------------------------|-------------------------------------------------------------------------------------|---------------------------------------------------------------------------------------|---------------------------------------------------------------------------------------|
| 1738   |    |    |    |    |    |    |
| 1749   |    |    |    |    |    |    |
| 2064   |    |    |    |    |    |    |
| 2216   |    |    |    |    |    |    |
| 2302   |    |    |    |    |    |    |
| 2370   |    |    |    |    |    |    |
| 2852   |  |  |  |  |  |  |
| 3157   |  |  |  |  |  |  |
| 3279   |  |  |  |  |  |  |
| 3295   |  |  |  |  |  |  |
| 3297   |  |  |  |  |  |  |
| 3616   |  |  |  |  |  |  |
| 3667   |  |  |  |  |  |  |
| 3811   |  |  |  |  |  |  |
| 3906   |  |  |  |  |  |  |
|        |  |  |  |  |  |  |

# Pc13\_P

| Cell # | Ch01                                                                                | Ch02                                                                                | Ch06                                                                                | Ch07                                                                                | Ch11                                                                                  | Ch02/Ch11/Ct                                                                          |
|--------|-------------------------------------------------------------------------------------|-------------------------------------------------------------------------------------|-------------------------------------------------------------------------------------|-------------------------------------------------------------------------------------|---------------------------------------------------------------------------------------|---------------------------------------------------------------------------------------|
| 266    |    |    |    |    |    |    |
| 479    |    |    |    |    |    |    |
| 581    |    |    |    |    |    |    |
| 674    |    |    |    |    |    |    |
| 740    |    |    |    |    |    |    |
| 742    |  |  |  |  |  |  |
| 821    |  |  |  |  |  |  |
| 845    |  |  |  |  |  |  |
| 849    |  |  |  |  |  |  |
| 883    |  |  |  |  |  |  |
| 884    |  |  |  |  |  |  |
| 992    |  |  |  |  |  |  |
| 1080   |  |  |  |  |  |  |
| 1171   |  |  |  |  |  |  |
| 1179   |  |  |  |  |  |  |
|        |  |  |  |  |  |  |

# Pc14\_P

| Cell # | Ch01                                                                                | Ch02                                                                                | Ch06                                                                                | Ch07                                                                                | Ch11                                                                                  | Ch02/Ch11/Ct                                                                          |
|--------|-------------------------------------------------------------------------------------|-------------------------------------------------------------------------------------|-------------------------------------------------------------------------------------|-------------------------------------------------------------------------------------|---------------------------------------------------------------------------------------|---------------------------------------------------------------------------------------|
| 226    |    |    |    |    |    |    |
| 227    |    |    |    |    |    |    |
| 229    |    |    |    |    |    |    |
| 238    |    |    |    |    |    |    |
| 240    |    |    |    |    |    |    |
| 242    |    |    |    |    |    |    |
| 244    |   |   |   |   |   |   |
| 247    |  |  |  |  |  |  |
| 249    |  |  |  |  |  |  |
| 250    |  |  |  |  |  |  |
| 252    |  |  |  |  |  |  |
| 253    |  |  |  |  |  |  |
| 255    |  |  |  |  |  |  |
| 257    |  |  |  |  |  |  |
| 262    |  |  |  |  |  |  |

# Pc15\_P

| Cell # | Ch01                                                                                | Ch02                                                                                | Ch06                                                                                | Ch07                                                                                | Ch11                                                                                  | Ch02/Ch11/Ct                                                                          |
|--------|-------------------------------------------------------------------------------------|-------------------------------------------------------------------------------------|-------------------------------------------------------------------------------------|-------------------------------------------------------------------------------------|---------------------------------------------------------------------------------------|---------------------------------------------------------------------------------------|
| 900    |    |    |    |    |    |    |
| 946    |    |    |    |    |    |    |
| 953    |    |    |    |    |    |    |
| 960    |    |    |    |    |    |    |
| 967    |    |    |    |    |    |    |
| 1026   |    |    |    |    |    |    |
| 1039   |   |   |   |   |   |   |
| 1048   |  |  |  |  |  |  |
| 1059   |  |  |  |  |  |  |
| 1077   |  |  |  |  |  |  |
| 1124   |  |  |  |  |  |  |
| 1128   |  |  |  |  |  |  |
| 1146   |  |  |  |  |  |  |
| 1182   |  |  |  |  |  |  |
| 1206   |  |  |  |  |  |  |
|        |  |  |  |  |  |  |



# *Pc16\_P*

| Cell # | Ch01                                                                                | Ch02                                                                                | Ch06                                                                                | Ch07                                                                                | Ch11                                                                                  | Ch02/Ch11/Ct                                                                          |
|--------|-------------------------------------------------------------------------------------|-------------------------------------------------------------------------------------|-------------------------------------------------------------------------------------|-------------------------------------------------------------------------------------|---------------------------------------------------------------------------------------|---------------------------------------------------------------------------------------|
| 5416   |    |    |    |    |    |    |
| 5750   |    |    |    |    |    |    |
| 5973   |    |    |    |    |    |    |
| 6010   |    |    |    |    |    |    |
| 6451   |    |    |    |    |    |    |
| 6475   |   |   |   |   |   |   |
| 6572   |  |  |  |  |  |  |
| 6673   |  |  |  |  |  |  |
| 6958   |  |  |  |  |  |  |
| 7043   |  |  |  |  |  |  |
| 7161   |  |  |  |  |  |  |
| 7537   |  |  |  |  |  |  |
| 7626   |  |  |  |  |  |  |
| 7692   |  |  |  |  |  |  |
| 7739   |  |  |  |  |  |  |

# *Pc17\_P* Professional phagocytes

| Cell # | Ch01                                                                                | Ch02                                                                                | Ch06                                                                                | Ch07                                                                                | Ch11                                                                                  | Ch02/Ch11/Ct                                                                          |
|--------|-------------------------------------------------------------------------------------|-------------------------------------------------------------------------------------|-------------------------------------------------------------------------------------|-------------------------------------------------------------------------------------|---------------------------------------------------------------------------------------|---------------------------------------------------------------------------------------|
| 819    |    |    |    |    |    |    |
| 848    |    |    |    |    |    |    |
| 865    |    |    |    |    |    |    |
| 877    |    |    |    |    |    |    |
| 881    |    |    |    |    |    |    |
| 959    |   |   |   |   |   |   |
| 980    |  |  |  |  |  |  |
| 1028   |  |  |  |  |  |  |
| 1031   |  |  |  |  |  |  |
| 1058   |  |  |  |  |  |  |
| 1079   |  |  |  |  |  |  |
| 1093   |  |  |  |  |  |  |
| 1145   |  |  |  |  |  |  |
| 1150   |  |  |  |  |  |  |
| 1161   |  |  |  |  |  |  |

# Pc18\_P

| Cell # | Ch01                                                                                | Ch02                                                                                | Ch06                                                                                | Ch07                                                                                | Ch11                                                                                  | Ch02/Ch11/Ct                                                                          |
|--------|-------------------------------------------------------------------------------------|-------------------------------------------------------------------------------------|-------------------------------------------------------------------------------------|-------------------------------------------------------------------------------------|---------------------------------------------------------------------------------------|---------------------------------------------------------------------------------------|
| 1290   |    |    |    |    |    |    |
| 1328   |    |    |    |    |    |    |
| 1414   |    |    |    |    |    |    |
| 1416   |    |    |    |    |    |    |
| 1420   |    |    |    |    |    |    |
| 1438   |    |    |    |    |    |    |
| 1459   |   |   |   |   |   |   |
| 1587   |  |  |  |  |  |  |
| 1588   |  |  |  |  |  |  |
| 1605   |  |  |  |  |  |  |
| 1661   |  |  |  |  |  |  |
| 1881   |  |  |  |  |  |  |
| 1948   |  |  |  |  |  |  |
| 2026   |  |  |  |  |  |  |
| 2038   |  |  |  |  |  |  |
|        |  |  |  |  |  |  |

# Pc19\_P

| Cell # | Ch01                                                                                | Ch02                                                                                | Ch06                                                                                | Ch07                                                                                | Ch11                                                                                  | Ch02/Ch11/Ct                                                                          |
|--------|-------------------------------------------------------------------------------------|-------------------------------------------------------------------------------------|-------------------------------------------------------------------------------------|-------------------------------------------------------------------------------------|---------------------------------------------------------------------------------------|---------------------------------------------------------------------------------------|
| 1289   |    |    |    |    |    |    |
| 1311   |    |    |    |    |    |    |
| 1366   |    |    |    |    |    |    |
| 1404   |    |    |    |    |    |    |
| 1466   |    |    |    |    |    |    |
| 1592   |    |    |    |    |    |    |
| 1779   |   |   |   |   |   |   |
| 1838   |  |  |  |  |  |  |
| 1902   |  |  |  |  |  |  |
| 1917   |  |  |  |  |  |  |
| 2132   |  |  |  |  |  |  |
| 2189   |  |  |  |  |  |  |
| 2213   |  |  |  |  |  |  |
| 2625   |  |  |  |  |  |  |
| 2886   |  |  |  |  |  |  |

# Pc20\_P

| Cell # | Ch01                                                                                | Ch02                                                                                | Ch06                                                                                | Ch07                                                                                | Ch11                                                                                  | Ch02/Ch11/Ct                                                                          |
|--------|-------------------------------------------------------------------------------------|-------------------------------------------------------------------------------------|-------------------------------------------------------------------------------------|-------------------------------------------------------------------------------------|---------------------------------------------------------------------------------------|---------------------------------------------------------------------------------------|
| 442    |    |    |    |    |    |    |
| 447    |    |    |    |    |    |    |
| 456    |    |    |    |    |    |    |
| 472    |    |    |    |    |    |    |
| 480    |    |    |    |    |    |    |
| 488    |    |    |    |    |    |    |
| 489    |   |   |   |   |   |   |
| 494    |  |  |  |  |  |  |
| 549    |  |  |  |  |  |  |
| 572    |  |  |  |  |  |  |
| 576    |  |  |  |  |  |  |
| 592    |  |  |  |  |  |  |
| 599    |  |  |  |  |  |  |
| 600    |  |  |  |  |  |  |
| 618    |  |  |  |  |  |  |
