# Supplementary material for: Image3C, a multimodal image-based and label-independent integrative method for single-cell analysis
Source: eLife. 2021 Jul 21;10:e65372. doi: 10.7554/eLife.65372 (PMC8370771; doi:10.7554/eLife.65372)
Supplement: Supplementary file 3. — Cell cluster properties (e.g., cell numbers per cluster, cell features used for clustering, feature values for each cluster) for zebrafish whole kidney marrow (WKM) morphology and phagocytosis assay and for P. canaliculata hemocyte morphology and phagocytosis assay. [file elife-65372-supp3.xlsx]

## Sheet: Fish_Morphology
Cluster ID	Identity	Cluster Color FDL	Overall Count	Counts/Replicate								Mean feature intensity used for clustering
				1	2	3	4	5	6	7	8	Aspect.Ratio_AdaptiveErode_BF:Aspect.Ratio_AdaptiveErode_BF	Bright.Detail.Intensity.R3_AdaptiveErode_BF_BF:Bright.Detail.Intensity.R3_AdaptiveErode_BF_BF	Bright.Detail.Intensity.R3_AdaptiveErode_BF_Draq5:Bright.Detail.Intensity.R3_AdaptiveErode_BF_Draq5	Circularity_AdaptiveErode_BF:Circularity_AdaptiveErode_BF	Circularity_Morphology_Draq5:Circularity_Morphology_Draq5	Contrast_AdaptiveErode_BF_BF:Contrast_AdaptiveErode_BF_BF	Contrast_AdaptiveErode_BF_SSC:Contrast_AdaptiveErode_BF_SSC	Diameter_AdaptiveErode_BF:Diameter_AdaptiveErode_BF	H.Energy.Mean_AdaptiveErode_BF_BF:H.Energy.Mean_AdaptiveErode_BF_BF	H.Energy.Mean_Morphology_Draq5:H.Energy.Mean_Morphology_Draq5	H.Entropy.Mean_AdaptiveErode_BF_BF:H.Entropy.Mean_AdaptiveErode_BF_BF	H.Entropy.Mean_Morphology_Draq5:H.Entropy.Mean_Morphology_Draq5	Intensity_AdaptiveErode_BF_Draq5:Intensity_AdaptiveErode_BF_Draq5	Lobe.Count_Morphology_Draq5:Lobe.Count_Morphology_Draq5	Max.Pixel_Morphology_Draq5:Max.Pixel_Morphology_Draq5	Shape.Ratio_AdaptiveErode_BF:Shape.Ratio_AdaptiveErode_BF	Std.Dev_AdaptiveErode_BF_BF:Std.Dev_AdaptiveErode_BF_BF
Dr1	Lymphocyte / Progenitor	java.awt.Color[r=147,g=207,b=229]	1890	220	150	195	287	265	329	208	236	13.7924	1.97344	0.888195	3.4921	3.78419	1.57907	0.717658	8.10422	0.737107	0.750777	12.9628	0.43126	23.3184	1.29608	21.2964	5.37863	2.56335
Dr2	Dead Cells	java.awt.Color[r=234,g=139,b=182]	2635	431	459	250	309	342	198	399	247	13.1432	1.04614	2.25361	2.35046	3.07796	1.42041	1.28695	6.91103	1.9311	4.05309	12.1997	-0.290097	23.1182	1.30788	22.8373	4.66923	1.99276
Dr3	Dead Cells	java.awt.Color[r=183,g=206,b=118]	956	212	233	28	96	180	69	41	97	13.8556	0.528713	0.641879	3.12279	5.0023	0.189823	0.125253	7.21497	1.48181	0.840202	11.8136	-0.708756	22.9717	1.31099	20.8438	5.13932	0.645562
Dr4	Dead Cells	java.awt.Color[r=105,g=52,b=148]	1007	113	135	144	140	98	69	197	111	13.5126	1.52853	1.27478	3.03404	3.99058	0.901073	0.493982	7.83676	5.20869	1.50934	10.088	-2.37849	22.9865	1.3334	21.7139	5.08425	2.56268
Dr5	Dead Cells	java.awt.Color[r=248,g=151,b=72]	1150	121	105	204	140	58	78	353	91	13.2103	1.42652	1.01376	2.11824	4.1543	1.3832	0.565084	6.02303	2.43564	0.991444	10.4643	-1.93155	22.283	1.29608	21.3675	4.54128	4.0218
Dr6	Erythrocytes	java.awt.Color[r=236,g=0,b=140]	714	78	108	65	191	54	91	29	98	12.0967	1.48988	4.63374	2.21754	1.9837	2.25124	0.938238	7.53313	0.869096	1.79627	12.473	-0.0653345	25.5265	2.65932	24.0393	4.77253	2.74014
Dr7	Lymphocyte / Progenitor	java.awt.Color[r=167,g=125,b=184]	9105	1353	857	814	1566	1085	1467	562	1401	13.6724	1.08618	1.2568	2.99026	3.45574	1.63635	0.690041	6.57495	0.802767	1.41744	12.0805	-0.471584	23.0569	1.30177	21.93	5.21419	2.24587
Dr8	Promyelocytes	java.awt.Color[r=96,g=57,b=19]	5476	590	555	737	698	856	1024	564	452	13.3267	3.01664	1.04564	3.10065	3.65018	2.78588	1.86808	8.25961	0.693679	0.892401	13.1839	0.65391	23.1722	1.30365	21.3228	4.98701	3.21826
Dr9	Debris	java.awt.Color[r=255,g=242,b=0]	432	83	56	28	52	36	58	17	102	13.5636	0.964761	1.61389	2.82974	2.37653	1.56335	0.68493	6.27334	0.868435	1.552	11.9057	-0.636715	23.0111	3.03619	22.0476	5.28659	1.96879
Dr10	Neutrophiles	java.awt.Color[r=241,g=103,b=76]	3993	444	529	522	676	318	873	260	371	13.2187	2.55106	1.7197	2.94285	2.23626	2.48453	1.81665	8.14517	0.82477	0.985453	13.0053	0.469596	23.3149	4.21997	21.6396	4.9356	2.64656
Dr11	Myeloid Precoursor	java.awt.Color[r=182,g=32,b=37]	1288	213	103	157	129	113	224	69	280	13.7317	1.76781	1.15002	3.39003	2.3184	1.50406	0.74556	7.87706	0.865763	0.88214	12.7981	0.258972	23.2916	2.81756	21.4391	5.31611	2.07937
Dr12	Dead Cells	java.awt.Color[r=93,g=186,b=71]	516	61	78	74	34	60	33	137	39	12.8625	1.30891	1.48551	1.98021	3.60758	1.41882	0.596005	6.18403	1.87834	1.72845	11.2698	-1.16063	22.7495	1.29859	22.1075	4.23482	3.51838
Dr13	Dead Cells	java.awt.Color[r=58,g=83,b=164]	463	52	137	64	33	34	29	79	35	14.335	1.6132	1.8352	4.23931	3.46171	0.981484	0.435136	7.98258	1.89538	2.41639	12.1937	-0.266435	23.2649	1.29608	22.4356	5.62281	2.12105
Dr14	Erythrocytes	java.awt.Color[r=129,g=131,b=131]	1649	217	137	101	530	163	160	91	250	13.056	1.37429	2.3598	2.9432	3.49126	0.78867	1.0802	8.43818	1.23045	1.10967	12.4576	-0.079936	25.4704	1.31258	23.5314	5.15972	1.47789
Dr15	Granulocytic / Monocytic cells	java.awt.Color[r=206,g=190,b=112]	8195	1152	771	943	1017	1220	1543	676	873	13.3348	2.77722	1.61733	3.00842	1.97367	2.64689	1.98711	8.22169	0.781714	1.0203	13.1203	0.584676	23.2255	2.59912	21.497	4.90415	2.76247
Dr16	Erythrocytes	java.awt.Color[r=36,g=165,b=204]	1494	204	179	121	406	106	188	83	207	12.7689	1.66612	3.72362	2.63617	2.08975	1.0317	1.15421	8.48964	1.22614	1.5341	12.6218	0.0883352	25.3088	2.78909	23.672	4.98576	1.67567

## Sheet: Fish_Phagocytosis
Cluster ID	Cluster Color FDL	Overall Count	Counts / Replicate / Treatment																		Mean feature intensity used for clustering
			Replicate 1			Replicate 2			Replicate 3			Replicate 4			Replicate 5			Replicate 6
			Cells + Bacteria	Cells + Bacteria + CCB	Cells + Bacteria + Ice	Cells + Bacteria	Cells + Bacteria + CCB	Cells + Bacteria + Ice	Cells + Bacteria	Cells + Bacteria + CCB	Cells + Bacteria + Ice	Cells + Bacteria	Cells + Bacteria + CCB	Cells + Bacteria + Ice	Cells + Bacteria	Cells + Bacteria + CCB	Cells + Bacteria + Ice	Cells + Bacteria	Cells + Bacteria + CCB	Cells + Bacteria + Ice	:Aspect.Ratio_AdaptiveErode_BF	:Bright.Detail.Intensity.R3_AdaptiveErode_BF_BF	:Bright.Detail.Intensity.R3_AdaptiveErode_BF_DHR	:Bright.Detail.Intensity.R3_AdaptiveErode_BF_Draq5	:Circularity_Morphology_Draq5	:Contrast_AdaptiveErode_BF_BF	:Diameter_AdaptiveErode_BF	:H.Energy.Mean_AdaptiveErode_BF_BF	:H.Energy.Mean_Intensity_DHR	:H.Energy.Mean_Intensity_Bacteria	:H.Energy.Mean_Morphology_Draq5	:H.Entropy.Mean_AdaptiveErode_BF_BF	:H.Entropy.Mean_Morphology_Draq5	:Intensity_AdaptiveErode_BF_Bacteria	:Intensity_AdaptiveErode_BF_Draq5	:Lobe.Count_Morphology_Draq5	:Max.Pixel_Intensity_Bacteria	:Max.Pixel_Intensity_SSC	:Mean.Pixel_Morphology_Draq5	:Shape.Ratio_AdaptiveErode_BF	:Std.Dev_AdaptiveErode_BF_BF
Dr1_P	java.awt.Color[r=79,g=129,b=189]	4779	40	84	589	39	103	558	34	185	237	90	491	289	68	667	321	81	626	277	6.23931	1.08259	0.376581	0.758783	2.65518	1.48345	4.41848	0.647025	0.231568	2.18269	1.05824	9.40091	6.9888	2.13117	-0.37164	1.20715	0.815795	0.284428	1.33682	2.62722	2.02294
Dr2_P	java.awt.Color[r=192,g=80,b=88]	6136	129	148	263	44	1408	68	36	57	62	22	808	26	58	1531	104	54	1263	55	5.75351	0.497281	0.0793207	0.214734	4.60493	0.27213	5.03715	3.49337	0.00138297	0.201147	0.320048	6.24087	7.86137	2.48658	-0.796692	1.12682	0.659903	0.218852	0.53772	1.82463	0.737972
Dr3_P	java.awt.Color[r=155,g=187,b=89]	6051	272	893	281	86	644	464	51	583	278	32	442	223	103	751	305	25	474	144	5.90248	0.633017	0.0900595	1.38968	2.18373	0.830056	4.47298	1.44792	0.00152764	0.498532	4.1735	7.96292	4.84312	2.37997	-0.932584	1.109	0.790285	0.501184	2.09178	2.13299	1.28546
Dr4_P	java.awt.Color[r=105,g=38,b=157]	4670	320	202	422	404	181	459	249	168	398	328	153	307	97	119	179	313	99	272	5.59081	2.45278	1.73869	0.582288	2.88998	2.21954	5.64882	0.446622	0.484225	0.684904	0.450024	9.03117	7.74984	2.38565	-0.518325	1.0953	1.70882	0.637168	1.03059	1.59945	3.00843
Dr5_P	java.awt.Color[r=247,g=150,b=70]	3257	83	70	29	86	658	46	48	704	32	87	450	33	32	439	11	33	398	18	6.14532	0.787722	1.09541	0.972757	2.77634	1.04022	4.2283	0.598598	1.41126	0.23588	0.701728	8.97152	7.28055	2.14289	1.01143	1.2202	0.582964	0.279105	2.08005	2.6147	1.49576
Dr6_P	java.awt.Color[r=29,g=78,b=49]	1799	64	159	108	29	162	160	12	130	94	10	132	76	24	262	127	8	189	53	6.06941	0.88982	0.106263	1.1899	2.22819	2.04895	4.22683	2.47975	0	1.14707	3.50615	7.28408	5.09316	2.44196	-1.0786	1.10366	1.6615	0.40422	1.74759	2.35334	2.71364
Dr7_P	java.awt.Color[r=244,g=11,b=244]	3340	127	318	216	33	332	255	20	178	200	23	289	83	49	535	265	22	290	105	5.75317	1.17905	0.114719	0.634171	2.90796	1.88162	4.04812	2.08452	0.0014656	1.3303	1.02779	6.7817	7.38162	2.54468	-1.31335	1.10279	2.96706	0.163046	0.974727	1.97394	4.30381
Dr8_P	java.awt.Color[r=0,g=255,b=255]	4988	331	49	211	389	16	303	650	25	713	397	4	479	401	19	366	321	8	306	4.85086	2.16928	0.583052	3.95185	0.889749	1.74869	5.99836	0.681403	0.27473	0.945876	1.31847	8.74535	6.93365	0.695006	0.833795	4.29389	1.13997	1.34264	3.12737	1.70641	2.5786
Dr9_P	java.awt.Color[r=0,g=128,b=152]	515	115	104	7	54	10	2	28	15	2	64	7	4	32	15	0	43	11	2	6.21074	0.700708	0.987771	0.891984	2.55528	1.07504	3.97355	0.527734	5.44605	0.153165	0.709706	8.20685	7.18698	2.4112	-0.586057	1.39318	0.614721	0.220019	1.83989	2.64529	1.54052
Dr10_P	java.awt.Color[r=255,g=69,b=0]	4329	90	59	106	73	447	61	43	151	39	38	2535	20	30	167	46	34	363	27	5.89323	0.550458	0.0899424	0.347197	3.96708	0.296435	4.67809	1.15119	0.00923844	0.0559683	0.412347	7.71538	7.66681	2.39698	0.0325487	1.08776	0.529495	0.126259	0.864612	2.11244	0.814415
Dr11_P	java.awt.Color[r=255,g=0,b=0]	2504	71	4	30	156	0	44	306	3	173	229	0	222	367	5	301	377	1	215	4.39608	2.06292	0.435055	2.71691	2.03815	2.69771	5.4774	0.672908	0.161274	0.838799	1.09689	8.57961	7.13219	0.346085	0.84065	4.10487	1.66717	0.273582	3.24264	1.52858	3.37677
Dr12_P	java.awt.Color[r=0,g=255,b=0]	1186	114	66	66	137	50	60	80	48	51	99	23	44	48	45	47	83	54	71	4.10224	3.53016	2.40706	1.74392	0.714518	1.69862	7.12688	0.699826	0.427214	0.675874	0.474687	8.74144	8.28854	2.83715	1.15104	4.09031	2.19921	0.779559	1.39535	1.04964	2.65138
Dr13_P	java.awt.Color[r=0,g=0,b=255]	1295	98	68	99	73	36	38	113	55	90	108	19	98	34	17	32	161	26	130	6.06406	3.68919	1.241	0.692493	3.15696	4.58927	5.62548	0.38604	0.511055	0.665881	0.344408	9.09223	8.00555	1.53656	0.18662	1.30192	2.20932	1.92457	1.12485	2.26518	4.54598
Dr14_P	java.awt.Color[r=100,g=100,b=100]	466	9	51	21	10	41	43	3	44	39	1	34	29	6	52	28	1	44	10	5.80061	0.678944	0.0960285	1.5308	2.01544	1.10844	4.33754	1.47642	0.00811678	0.667284	4.50175	7.93515	4.32903	2.41736	-1.12345	4.2653	0.955607	0.494069	1.9187	1.93847	1.50399
Dr15_P	java.awt.Color[r=205,g=190,b=112]	1117	71	107	49	11	100	85	10	70	81	5	103	55	9	159	74	6	86	36	5.85777	1.01547	0.11914	1.10357	2.33502	2.5498	3.91225	1.35554	0.00191249	1.26425	2.51103	7.58523	5.61496	2.46545	-1.08358	1.10528	2.03189	0.314217	1.63916	2.08452	3.57602
Dr16_P	java.awt.Color[r=0,g=191,b=255]	2947	153	13	97	272	6	139	281	2	189	308	4	243	287	3	284	358	7	301	4.24014	2.40452	0.522303	2.12792	1.7048	2.59118	5.53715	0.670972	0.408062	0.663161	0.733366	8.36198	7.7696	0.592097	0.781226	2.06688	1.91041	0.35495	2.50203	1.41652	3.62869
Dr17_P	java.awt.Color[r=139,g=0,b=139]	4713	324	15	164	350	4	186	341	11	323	320	3	375	823	16	602	469	5	382	4.08718	2.22421	0.514452	3.39327	1.48605	3.41801	5.30085	0.536578	0.45241	0.996916	1.23366	9.15471	6.83224	0.425804	0.914247	1.96672	1.48906	0.38783	3.74934	1.38434	3.59724
Dr18_P	java.awt.Color[r=173,g=255,b=47]	10985	631	688	987	573	447	908	444	526	690	544	511	568	476	582	615	539	559	697	4.93214	1.22892	0.642257	0.767417	2.83904	1.36549	4.89721	0.563999	0.598863	1.08237	0.720286	8.68278	7.28795	2.65402	-0.297246	1.12399	1.45372	0.28474	1.46501	0.86013	2.23213
Dr19_P	java.awt.Color[r=238,g=118,b=0]	4911	194	51	194	314	29	224	493	24	538	458	18	360	456	19	494	537	17	491	5.45686	2.51644	0.474119	1.904	1.65694	0.992219	6.64914	0.696626	0.121415	1.06136	0.733278	8.76682	7.62526	1.13624	0.916247	2.02431	1.27493	1.26057	2.67183	0.558779	2.12332
Dr20_P	java.awt.Color[r=113,g=198,b=113]	1378	102	30	36	84	7	46	140	7	108	128	2	125	158	7	158	123	2	115	5.73877	2.27297	0.467151	1.96994	1.64687	1.28636	6.14592	0.613458	0.0794037	0.990791	0.858562	8.66351	7.35292	1.05884	0.639306	2.00607	1.05842	6.19355	2.60607	2.17768	2.30682
Dr21_P	java.awt.Color[r=187,g=25,b=104]	596	40	34	55	32	8	15	45	21	56	44	8	30	15	9	11	79	12	82	5.92239	3.26351	1.37091	0.946577	2.39967	4.13072	5.89497	0.490626	0.564475	1.01148	0.488884	9.30804	7.95755	0.930454	0.265978	1.95217	1.47252	5.70665	1.24865	1.8494	3.12338
Dr22_P	java.awt.Color[r=104,g=53,b=9]	29507	1501	1778	2234	1352	1367	2026	1240	1624	1312	1554	1412	1916	1350	1783	1630	1667	1729	2032	6.23938	1.10984	0.651705	0.802211	2.64599	1.5826	4.48986	0.56804	0.632753	1.07787	0.826909	8.27363	7.20151	2.52205	-0.323819	1.38235	1.33174	0.25411	1.49403	2.62562	2.51672
Dr23_P	java.awt.Color[r=85,g=168,b=247]	17280	816	136	674	1226	85	760	1651	99	1238	1723	23	1594	1912	88	1849	1753	46	1607	5.85376	2.29153	0.496097	2.05711	1.58402	1.08224	6.2172	0.663387	0.199012	1.03336	0.815401	8.77694	7.50732	1.07317	0.902573	2.02625	1.00549	0.747797	2.85943	2.58658	2.17332
Dr24_P	java.awt.Color[r=181,g=1,b=39]	11311	1309	1711	588	768	724	485	508	750	261	721	630	368	583	534	280	424	457	210	6.06401	0.709281	0.6388	0.935765	2.47533	0.901818	4.21157	0.713608	0.602765	0.0862921	0.969732	8.56062	7.11495	2.27191	-0.404342	1.46562	0.553623	0.246645	1.73103	2.42574	1.31482
Dr25_P	java.awt.Color[r=246,g=40,b=240]	2663	127	13	88	223	3	112	339	5	180	297	1	221	298	7	293	246	1	209	5.7906	2.46542	0.317801	1.66	1.59341	1.04722	6.31454	0.559794	0.034647	0.868161	0.690596	8.80403	7.6302	1.13107	0.653766	2.14733	1.06512	3.1602	2.27731	2.56958	2.30998
Dr26_P	java.awt.Color[r=141,g=242,b=233]	36876	2335	2864	2189	1830	2750	2134	1517	4124	2455	1241	1820	1611	868	1914	1168	1507	2862	1687	5.70521	2.31166	1.784	0.966679	1.5131	2.13672	5.56561	0.509038	0.640225	0.902841	0.481217	8.94179	7.85494	2.56469	0.0180155	2.62908	1.8724	0.671011	1.17869	1.81329	2.64548

## Sheet: Snail_Morphology
Cluster ID	Identity	Cluster Color FDL	Overall Count	Counts Replicate					Mean feature intensity used for clustering
				1	2	3	4	5	Area_Intensity_SSC:Area_Intensity_SSC	Aspect.Ratio_AdaptiveErode_BF:Aspect.Ratio_AdaptiveErode_BF	Bright.Detail.Intensity.R3_AdaptiveErode_BF_Draq5:Bright.Detail.Intensity.R3_AdaptiveErode_BF_Draq5	Circularity_Morphology_DNA:Circularity_Morphology_Draq5	Contrast_AdaptiveErode_BF_Ch01:Contrast_AdaptiveErode_BF_BF	Contrast_AdaptiveErode_BF_SSC:Contrast_AdaptiveErode_BF_SSC	Diameter_AdaptiveErode_BF:Diameter_AdaptiveErode_BF	H.Energy.Mean_AdaptiveErode_BF_BF:H.Energy.Mean_AdaptiveErode_BF_BF	H.Energy.Mean_Morphology_Draq5:H.Energy.Mean_Morphology_Draq5	H.Entropy.Mean_AdaptiveErode_BF_BF:H.Entropy.Mean_AdaptiveErode_BF_BF	H.Entropy.Mean_Morphology_Draq5:H.Entropy.Mean_Morphology_Draq5	Intensity_AdaptiveErode_BF_SSC:Intensity_AdaptiveErode_BF_SSC	Intensity_AdaptiveErode_BF_Draq5:Intensity_AdaptiveErode_BF_Draq5	Lobe.Count_Morphology_DNA_Draq5:Lobe.Count_Morphology_DNA_Draq5	Shape.Ratio_AdaptiveErode_BF:Shape.Ratio_AdaptiveErode_BF	Std.Dev_AdaptiveErode_BF_BF:Std.Dev_AdaptiveErode_BF_BF
Pc1	Agranular large hemocytes	java.awt.Color[r=66,g=61,b=252]	10930	2316	2835	2133	2447	1199	0.543542	7.55591	1.04254	3.87109	1.32626	1.73171	5.08005	2.18289	1.07428	9.72488	7.14432	1.05854	27.7673	1.20756	2.74242	2.28447
Pc2	Blast-like hemocytes	java.awt.Color[r=192,g=80,b=88]	1729	383	474	356	177	339	0.463768	8.01663	2.95582	2.20807	2.28123	2.37853	4.24316	2.04261	2.11916	10.4856	6.17469	0.831644	28.8727	2.73634	3.26218	2.69114
Pc3	Intermediate hemocytes	java.awt.Color[r=242,g=224,b=6]	2015	393	600	465	215	342	0.624467	8.15229	2.04536	3.3299	2.32737	2.05877	4.35611	1.98763	1.54328	10.9226	6.71564	0.956461	28.856	1.22813	3.38263	3.16428
Pc4	Intermediate hemocytes	java.awt.Color[r=169,g=113,b=234]	4899	1162	938	1292	537	970	0.275023	8.10881	2.75517	2.71876	2.39954	1.55473	4.05864	1.61987	2.09937	9.15009	6.3012	0.554504	29.1085	1.9997	3.27129	3.78001
Pc5	Doublets and Dead cells	java.awt.Color[r=247,g=150,b=70]	276	59	48	82	58	29	0.200397	6.63575	2.41034	1.27566	1.08523	1.22419	4.94961	2.5884	1.12934	9.39451	7.22572	0.756117	28.5377	4.47049	2.09055	2.00822
Pc6	Granular large hemocytes	java.awt.Color[r=21,g=186,b=17]	3152	542	658	988	513	451	0.733189	7.52718	1.43044	2.08972	1.58942	2.09086	5.55284	2.25504	0.936804	9.94579	7.42333	1.398	28.0372	2.8127	2.72601	2.39268
Pc7	Agranular large hemocytes	java.awt.Color[r=244,g=113,b=244]	3081	701	475	793	695	417	0.141017	7.36033	1.54194	2.29969	1.14774	1.25813	4.24781	2.13552	1.15315	9.53236	7.10849	0.503693	27.8661	2.77467	2.797	2.04254
Pc8	Doublets and Dead cells	java.awt.Color[r=122,g=255,b=255]	867	121	103	286	214	143	0.961962	6.39431	1.79988	1.40085	1.61502	1.97977	6.20684	2.57176	0.828389	9.7709	7.86657	1.77485	28.6557	4.39256	1.62554	2.57819
Pc9	Agranular large hemocytes	java.awt.Color[r=255,g=0,b=0]	8520	2177	2266	1334	1984	759	0.21814	8.00399	1.24438	3.60483	1.3242	1.34251	3.94854	2.24126	1.45942	9.61904	6.70486	0.517395	27.6073	1.18198	3.22775	2.07447

## Sheet: Snail_Phagocytosis
Cluster ID	Cluster Color FDL	Overall Count	Counts/Replicates / Treatment															Mean feature intensity used for clustering
			Replicate 1			Replicate 2			Replicate 3		Replicate 4			Replicate 5
			Cells + Bacteria	Cells + Bacteria + EDTA	Cells + Bacteria + Ice	Cells + Bacteria	Cells + Bacteria + EDTA	Cells + Bacteria + Ice	Cells + Bacteria + EDTA	Cells + Bacteria + Ice	Cells + Bacteria	Cells + Bacteria + EDTA	Cells + Bacteria + Ice	Cells + Bacteria	Cells + Bacteria + EDTA	Cells + Bacteria + Ice	:Area_Intensity_DHR	:Bright.Detail.Intensity.R3_AdaptiveErode_BF_DHR	:Bright.Detail.Intensity.R3_AdaptiveErode_BF_Draq5	:Circularity_AdaptiveErode_BF	:Circularity_Morphology_Draq5	:Contrast_AdaptiveErode_BF_BF	:Contrast_AdaptiveErode_BF_SSC	:Diameter_AdaptiveErode_BF	:H.Energy.Mean_AdaptiveErode_BF_BF	:H.Energy.Mean_Intensity_DHR_Bacteria	:H.Energy.Mean_Morphology_Draq5	:H.Entropy.Mean_AdaptiveErode_BF_BF	:H.Entropy.Mean_Intensity_Bacteria	:H.Entropy.Mean_Morphology_Draq5	:Intensity_AdaptiveErode_BF_DHR	:Intensity_AdaptiveErode_BF_SSC	:Intensity_AdaptiveErode_BF_Bacteria	:Intensity_AdaptiveErode_BF_Draq5	:Lobe.Count_Morphology_Draq5	:Max.Pixel_Intensity_Bacteria	:Max.Pixel_Intensity_SSC	:Std.Dev_AdaptiveErode_BF_BF
Pc1_P	java.awt.Color[r=79,g=129,b=189]	9687	669	224	1031	845	393	1155	365	799	891	325	1114	715	329	832	0.0332284	0.937924	1.14298	2.02526	3.30956	2.04854	2.52967	4.35218	2.07607	0.0126484	1.13152	10.2758	0.0205789	6.95558	4.68768	9.58642	1.7755	-0.236728	1.16772	0.220634	1.41845	2.57163
Pc2_P	java.awt.Color[r=192,g=80,b=88]	9317	952	238	1237	728	274	926	267	1269	533	195	527	859	334	978	0.00465368	0.560045	2.91361	2.15936	2.43159	2.18696	2.16781	3.61772	1.71111	0.00132429	2.11548	10.607	0.00736195	6.19498	3.6145	8.87056	2.44708	0.990905	1.79099	0.153345	0.96393	2.84119
Pc3_P	java.awt.Color[r=155,g=187,b=89]	2297	148	74	76	169	83	105	236	279	202	71	183	249	152	270	0.000124	0.403412	1.1798	1.8182	2.14446	0.935805	0.96314	3.39067	1.75103	0	1.02837	9.31883	0.000483	7.1954	3.02801	7.734	2.77791	-0.830615	2.26195	0.0774587	0.110123	1.94274
Pc4_P	java.awt.Color[r=105,g=38,b=157]	130	4	3	13	12	3	13	12	27	11	3	16	6	3	4	0.00481863	1.08485	1.42729	1.15958	1.73022	2.95769	2.472	4.69753	2.36577	0	0.68322	9.79297	10.1045	7.8168	4.52399	9.83801	6.75379	-0.865056	3.0725	12.1221	1.16801	2.96201
Pc5_P	java.awt.Color[r=247,g=150,b=70]	510	64	8	111	95	5	115	6	2	30	1	26	39	4	4	12.0861	6.30868	2.32395	1.66741	2.36312	2.2215	1.91775	4.62817	1.79742	0.86327	1.88037	10.181	0.180388	6.45046	7.07069	9.32835	2.22735	0.419296	1.8379	0.847481	0.81047	3.17157
Pc6_P	java.awt.Color[r=29,g=78,b=49]	2289	303	46	164	228	36	143	111	101	320	32	313	206	94	192	0.000127	0.421899	0.915505	1.17267	3.581	1.06685	0.856346	3.45888	2.44033	0	0.997742	9.02593	0.0397788	7.07995	2.94332	7.59746	3.64636	-0.931908	1.09223	1.96621	0.0720096	2.15445
Pc7_P	java.awt.Color[r=244,g=11,b=244]	7784	757	334	840	642	253	693	225	922	443	239	466	743	349	878	0.00535684	0.848837	2.51868	2.13133	2.63347	2.89364	1.4936	3.6784	1.24969	0.00219111	1.7593	9.52163	1.02152	6.53586	3.5442	8.64762	3.29962	0.884371	1.66328	1.53979	0.65718	4.57823
Pc8_P	java.awt.Color[r=0,g=255,b=255]	2981	174	99	162	254	116	236	184	432	196	119	301	308	83	317	0.095855	1.92323	1.32829	1.03834	1.26539	1.72717	2.13636	5.56667	2.46507	0.0370894	0.636869	9.89982	0.0317452	7.92453	4.97493	10.0245	1.80225	-0.521604	3.73022	0.6265	0.999767	2.6039
Pc9_P	java.awt.Color[r=0,g=128,b=152]	1755	227	31	276	128	46	220	38	251	79	24	93	130	43	169	0.00319351	0.644025	3.15136	2.17195	2.3645	2.45218	1.83516	3.45696	1.39547	0.00401068	2.34203	9.47806	0.016962	5.97164	3.54745	8.60265	3.20614	1.09293	1.86139	0.371648	0.72588	3.36183
Pc10_P	java.awt.Color[r=255,g=69,b=0]	16790	955	2147	696	1172	2015	679	1568	520	1061	2111	665	853	1793	555	0.0131471	0.926255	1.36191	1.50667	3.23928	1.77541	1.34686	4.55719	1.73596	0.00546258	1.07015	9.91682	0.951313	7.13415	4.25329	8.86583	3.39719	-0.368842	1.1266	1.68076	0.439327	3.27965
Pc11_P	java.awt.Color[r=255,g=0,b=0]	23623	786	3819	704	694	3487	526	2591	722	669	3763	652	869	3519	822	0.0228821	1.00777	1.91042	1.27772	1.95505	1.618	1.28611	4.87824	1.96695	0.00845315	1.0753	9.90997	0.318091	7.14755	4.31219	8.95168	3.3664	-0.269956	2.51063	1.46844	0.403549	2.93279
Pc12_P	java.awt.Color[r=0,g=255,b=0]	1182	58	19	116	108	23	176	17	107	144	27	173	74	38	102	0.0319422	0.771784	1.04187	4.0638	3.37955	1.19973	1.7454	4.2668	1.4768	0.0022085	1.19938	9.71704	0.000916	6.82166	5.0396	9.10886	2.97927	-0.344596	1.03824	0.107733	0.444942	2.22435
Pc13_P	java.awt.Color[r=0,g=0,b=255]	1590	123	35	160	108	43	172	47	154	97	57	210	131	70	183	0.178835	1.86742	2.3497	0.917463	0.985393	1.48463	1.97366	5.89236	2.18128	0.256481	0.767876	10.0231	0.04213	7.80093	5.04524	10.0466	2.45185	1.51165	3.90871	0.381878	0.906553	2.54696
Pc14_P	java.awt.Color[r=0,g=0,b=0]	25773	2673	694	2386	2543	686	2456	975	1425	3022	713	2742	2476	832	2150	0.109457	0.805615	1.05022	1.82996	3.46563	1.16073	1.38173	4.05577	2.02134	0.0498763	1.247	9.46537	0.0306099	6.89184	4.09092	8.50961	2.94154	-0.474438	1.07963	0.366657	0.33868	2.17649
Pc15_P	java.awt.Color[r=205,g=190,b=112]	8166	496	353	403	619	658	502	890	392	918	441	732	658	488	616	0.00267344	0.468477	1.05145	1.98822	3.43679	1.27702	1.27808	3.57776	1.8526	2.41e-05	1.10118	10.711	0.00259845	6.97238	3.46303	8.10233	2.08656	-0.650338	1.07953	0.103371	0.290431	2.18366
Pc16_P	java.awt.Color[r=0,g=191,b=255]	927	64	9	35	66	18	48	77	99	123	13	81	126	27	141	0	0.308912	1.17653	1.91572	2.20667	1.03243	1.03052	3.12178	1.92578	0	1.05111	10.4088	0	7.01361	2.89602	7.57259	2.28283	-0.741459	2.29226	0.00972082	0.0890734	1.7263
Pc17_P	java.awt.Color[r=139,g=0,b=139]	1812	391	41	69	320	36	95	28	42	305	25	49	328	57	26	3.2027	3.20753	1.59777	1.73576	2.65895	1.58841	1.85001	4.55266	2.01683	5.78601	1.48475	10.0219	0.181169	6.76218	6.09898	9.21631	2.59269	0.0191814	1.68595	0.628984	0.659553	2.55593
Pc18_P	java.awt.Color[r=173,g=255,b=47]	2435	207	228	179	103	195	134	68	120	115	342	188	161	208	187	0.0289917	1.70489	2.94018	0.838311	0.960221	1.5509	1.62281	6.30448	2.40986	0.0293354	0.726259	9.77179	0.841192	7.91009	4.95559	9.95031	3.87726	1.95695	3.90331	1.78688	0.736712	3.01239
Pc19_P	java.awt.Color[r=238,g=118,b=0]	867	61	21	21	63	14	41	81	161	69	25	55	97	41	117	0.0016331	0.427149	1.89607	1.06863	1.24976	0.871022	0.958016	3.49632	2.12834	0	1.51916	9.49688	0.000612	6.82833	2.99467	7.78392	2.61536	-0.741622	4.01484	0.0713126	0.143654	1.75539
Pc20_P	java.awt.Color[r=113,g=198,b=113]	13793	634	1177	832	652	1296	795	1282	918	739	1360	781	916	1263	1148	0.0166059	0.834223	1.54526	1.70654	1.98076	1.49791	1.7194	4.53679	1.85366	0.016957	1.05604	10.236	0.00515832	7.06646	4.53185	9.13272	2.3526	-0.333037	2.46277	0.177394	0.559164	2.37781
