# Supplementary figures and images for: Image3C, a multimodal image-based and label-independent integrative method for single-cell analysis
Source: eLife journal article supplement (doi:10.7554/elife.65372), 2021-07-21

# Image3C pipeline

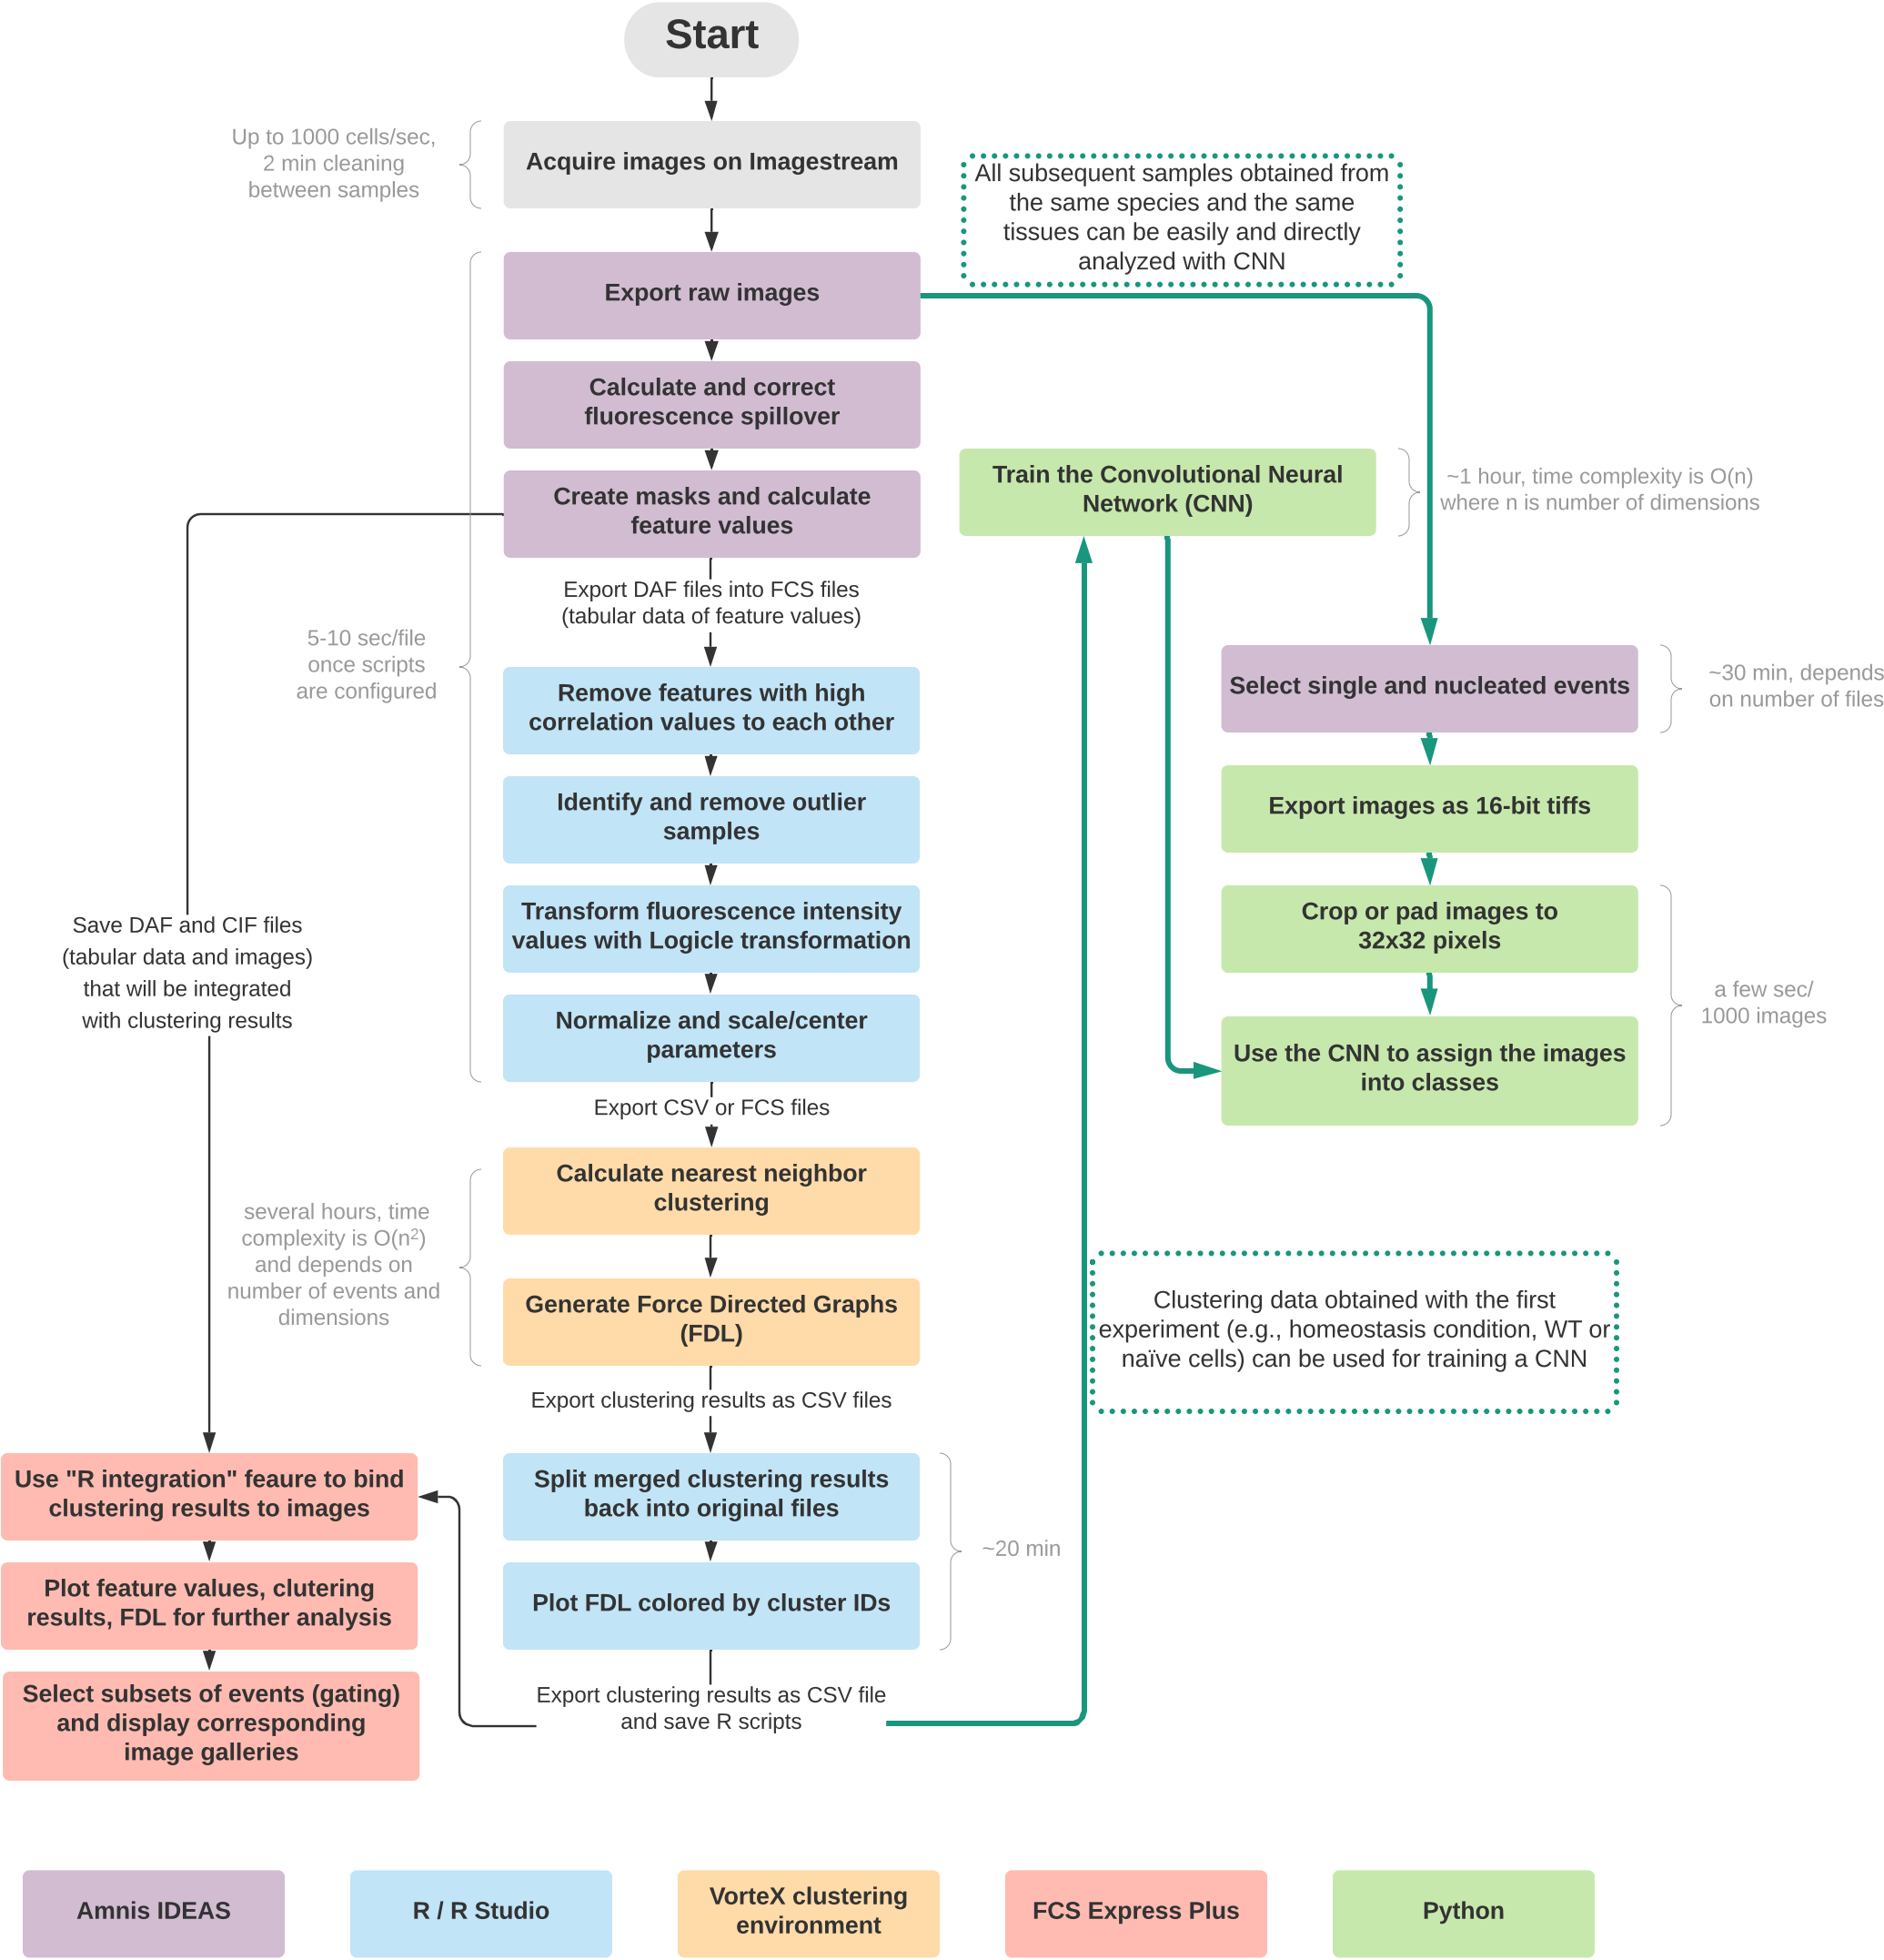

Supplement: supp [file elife-65372-supp-v1.zip]
